# Supplementary material
Source: publisher figshare collection journal article supplement (https://gsajournals.figshare.com/ndownloader/files/20140712)
Supplement: Supplementary file 1 [file 20140712]

Supplemental Information (Three Tables and Eight Figures)

**Table S1. Sequences, subfamilies and accession numbers.**

| Subfamily                       | Name (synonym) - Accession Number - Description - Species                         |
|---------------------------------|-----------------------------------------------------------------------------------|
| Activin                         | CeTIG-3 NP_497318.2 transforming growth factor beta family [C elegans]            |
| Activin                         | DmActivin-beta NP_651942.2 activin-beta [D melanogaster]                          |
| Activin                         | DmMyoglianin NP_726604.1 myoglianin, isoform A [D melanogaster]                   |
| Activin                         | MmBmp3 NP_001297606.1 bone morphogenetic protein 3 isoform 1 [M musculus]         |
| Activin                         | MmGdf10 NP_665684.2 growth/differentiation factor 10 preproprotein [M musculus]   |
| Activin                         | MmGdf11 NP_034402.1 growth/differentiation factor 11 preproprotein [M musculus]   |
|                                 | Synonym BMP11                                                                     |
| Activin                         | MmInhba NP_032406.1 inhibin beta A chain preproprotein [M musculus]               |
| Activin                         | MmInhbb NP_032407.1 inhibin beta B chain preproprotein [M musculus]               |
| Activin                         | MmInhbc NP_034695.1 inhibin beta C chain preproprotein [M musculus]               |
| Activin                         | MmInhbe NP_032408.2 inhibin beta E chain preproprotein [M musculus]               |
| Activin                         | MmMstn NP_034964.1 growth/differentiation factor 8 preproprotein [M musculus]     |
| 11 Activin                      | Synonym GDF8                                                                      |
| BMP                             | CeDBL-1 NP_504709.1 Dpp/BMP-Like [C elegans]                                      |
| BMP                             | CeTIG-2 NP_504271.1 transforming growth factor beta family [C elegans]            |
| BMP                             | DmDPP NP_477311.1 decapentaplegic, isoform A [D melanogaster]                     |
| BMP                             | DmGBB NP_477340.1 glass bottom boat, isoform A [D melanogaster]                   |
| BMP                             | DmSCW NP_524863.3 screw, isoform A [D melanogaster]                               |
| BMP                             | MmBmp2 NP_031579.2 bone morphogenetic protein 2 preproprotein [M musculus]        |
| BMP                             | MmBmp4 NP_001303289.1 bone morphogenetic protein 4 preproprotein [M musculus]     |
| BMP                             | MmBmp5 NP_031581.2 bone morphogenetic protein 5 preproprotein [M musculus]        |
| BMP                             | MmBmp6 NP_031582.1 bone morphogenetic protein 6 preproprotein [M musculus]        |
| BMP                             | MmBmp7 NP_031583.2 bone morphogenetic protein 7 preproprotein [M musculus]        |
| BMP                             | MmBmp8a NP_001242948.1 bone morphogenetic protein 8A isoform 1 [M musculus]       |
| BMP                             | MmBmp8b NP_031585.2 bone morphogenetic protein 8B preproprotein [M musculus]      |
| BMP                             | MmBmp10 NP_033886.2 bone morphogenetic protein 10 preproprotein [M musculus]      |
| BMP                             | MmBmp15 NP_033887.1 bone morphogenetic protein 15 preproprotein [M musculus]      |
| BMP                             | MmGdf1 NP_032133.2 embryonic growth/differentiation factor 1 [M musculus]         |
| BMP                             | MmGdf2 NP_062379.3 growth/differentiation factor 2 preproprotein [M musculus]     |
|                                 | Synonym BMP9                                                                      |
| BMP                             | MmGdf3 NP_032134.2 growth/differentiation factor 3 preproprotein [M musculus]     |
| BMP                             | MmGdf5 NP_032135.2 growth/differentiation factor 5 preproprotein [M musculus]     |
| BMP                             | MmGdf6 NP_038554.1 growth/differentiation factor 6 preproprotein [M musculus]     |
| BMP                             | MmGdf7 NP_001299805.1 growth/differentiation factor 7 isoform 1 [M musculus]      |
| BMP                             | MmGdf9 NP_032136.2 growth/differentiation factor 9 precursor [M musculus]         |
| BMP                             | MmNodal NP_038639.2 nodal preproprotein [M musculus]                              |
| 22 BMP                          |                                                                                   |
| TGF-β                           | CeDAF-7 NP_497265.1 dauer larva development growth factor daf-7 [C elegans]       |
| TGF-β                           | CeUNC-129 NP_501566.1 uncharacterized protein CELE_C53D6.2 [C elegans]            |
| TGF-β                           | DmDawdle NP_523461.1 dawdle, isoform A [D melanogaster]                           |
| TGF-β                           | DmMaverick NP_524626.1 maverick [D melanogaster]                                  |
| TGF-β                           | MmAmh NP_031471.2 muellerian-inhibiting factor precursor [M musculus]             |
|                                 | Synonym MIS                                                                       |
| TGF-β                           | MmGdf15 NP_035949.2 growth/differentiation factor 15 preproprotein [M musculus]   |
| TGF-β                           | MmInha NP_034694.3 inhibin alpha chain isoform 1 preproprotein [M musculus]       |
| TGF-β                           | MmLefty1 NP_034224.1 left-right determination factor 1 preproprotein [M musculus] |
| TGF-β                           | MmLefty2 NP_796073.1 left-right determination factor 2 preproprotein [M musculus] |
| TGF-β                           | MmTgfb1 NP_035707.1 transforming growth factor beta-1 preproprotein [M musculus]  |
| TGF-β                           | MmTgfb2 NP_001316036.1 transforming growth factor beta-2 isoform 2 [M musculus]   |
| TGF-β                           | MmTgfb3 NP_033394.2 transforming growth factor beta-3 precursor [M musculus]      |
| 12 TGF-β                        |                                                                                   |
| 45 total TGF-β family sequences |                                                                                   |
| outgroup                        | MmGdnf NP_034405.1 glial cell line-derived neurotrophic factor 1 [M musculus]     |

**Table S2. Cleavage site identified computationally separating prodomain and ligand.**

| Subfamily    | Name           | Residue | Prodomain  | Cleavage site | Ligand      |
|--------------|----------------|---------|------------|---------------|-------------|
| Activin      | CeTIG-3        | 125     | NVINALSVLR | //            | NAPNFDVMVF  |
| Activin      | DmActivin-beta | 822     | TESSRTRRVR | //            | RRAVDCGGAL  |
| Activin      | DmMyoglianin   | 483     | GSQKKHRRKR | //            | SVYMDCTEND  |
| Activin      | MmBmp3         | 276     | ALSVERRKKR | //            | STGILLPLQN  |
| Activin      | MmGdf10        | 328     | LKPRTGRKDR | //            | KKKDQDTFTA  |
| Activin      | MmGdf11        | 287     | VLENTKRSRR | //            | NLGLDCDEHS  |
| Activin      | MmInhba        | 298     | SEDHPHRRRR | //            | RGLECDGKVN  |
| Activin      | MmInhbb        | 285     | RLGDSRHRIR | //            | KRGLECDGRT  |
| Activin      | MmInhbc        | 226     | RVEGKHVRVR | //            | RGIDCQGASR  |
| Activin      | MmInhbe        | 227     | EPGAGRARRR | //            | TPTCEPETPL  |
| Activin      | MmMstn         | 258     | VTDTPKRSRR | //            | DFGLDCDEHS  |
|              |                |         |            |               |             |
| BMP          | CeDBL-1        | 227     | SEPSSVRRKR | //            | SAQTGNSERK  |
| BMP          | CeTIG-2        | 258     | KPNENERCQR | //            | KGLYVDFDIL  |
| BMP          | DmDPP          | 463     | GGGKGGRNKR | //            | QPRRPTRRKN  |
| BMP          | DmGBB          | 316     | AHSSHRSKR  | //            | SASHPRKRKK  |
| BMP          | DmSCW          | 262     | VKIQKLRFKR | //            | DLEKRRAGGG  |
| BMP          | MmBmp2         | 271     | GHPLHKREKR | //            | QAKHKQKRKL  |
| BMP          | MmBmp4         | 283     | HTLTRRRAKR | //            | SPKHHPQRSR  |
| BMP          | MmBmp5         | 307     | ASEVLLRSVR | //            | AASKRKNQNR  |
| BMP          | MmBmp6         | 362     | VSEVHVRTTR | //            | SASSRRRQQS  |
| BMP          | MmBmp7         | 282     | ATEVHLRSIR | //            | STGGKQRSQN  |
| BMP          | MmBmp8a        | 251     | ASQSPVRAPR | //            | AARPLKRRQP  |
| BMP          | MmBmp8b        | 254     | SPVRAPRTAR | //            | PLKKKQLNQI  |
| BMP          | MmBmp10        | 304     | IDDSSARIRR | //            | NAKGNKYCKKT |
| BMP          | MmBmp15        | 258     | ESSFLMRSVR | //            | QACSIEDAS   |
| BMP          | MmGdf1         | 246     | GPVGTCRTRR | //            | LHVSFREVGVW |
| BMP          | MmGdf2         | 309     | VGPLLARRKR | //            | STGASSHCQK  |
| BMP          | MmGdf3         | 243     | HCHPSSRKRR | //            | AAISVPKGFC  |
| BMP          | MmGdf5         | 365     | EYLFSQRRKR | //            | RAPLANRQGGK |
| BMP          | MmGdf6         | 346     | GKKSRLRCSR | //            | KPLHVNFKEL  |
| BMP          | MmGdf7         | 348     | AGRGHGRRGR | //            | SRCSRKSLHV  |
| BMP          | MmGdf9         | 297     | EVERSPRRRR | //            | GQKAIRSEAK  |
| BMP          | MmNodal        | 234     | ERGGWGRRQR | //            | RHHLPPDRSQL |
|              |                |         |            |               |             |
| TGF- $\beta$ | CeDAF-7        | 225     | TRPKGSRKRR | //            | SHAKPVCNAE  |
| TGF- $\beta$ | CeUNC-129      | 280     | FGEETSREER | //            | ERIANEELAN  |
| TGF- $\beta$ | DmDawdle       | 457     | IVIDMQNRRR | //            | KSRQKRSINC  |
| TGF- $\beta$ | DmMaverick     | 577     | HRSNHDSTWR | //            | KDKWTNNCYK  |
| TGF- $\beta$ | MmAmh          | 437     | GREGRGRTGR | //            | SAGTGTGPGC  |
| TGF- $\beta$ | MmGdf15        | 179     | LRVAAGRGRR | //            | SAHAHPRDSC  |
| TGF- $\beta$ | MmInha         | 224     | APSAGERARR | //            | STPSVPWPWS  |
| TGF- $\beta$ | MmLefty1       | 211     | GTWSSHKLVR | //            | FAAQGTPDGK  |
| TGF- $\beta$ | MmLefty2       | 211     | GTWSAHKLVR | //            | FAAQGTPDGK  |
| TGF- $\beta$ | MmTgfb1        | 269     | QHLHSSRHRR | //            | ALDTNYCFSS  |
| TGF- $\beta$ | MmTgfb2        | 321     | SQQSSRRKKR | //            | ALDAAYCFRN  |
| TGF- $\beta$ | MmTgfb3        | 291     | PGQGSQRKKR | //            | ALDTNYCFRN  |
|              |                |         |            |               |             |
| outgroup     | MmGdnf         | 111     | QAAALPRRER | //            | NRQAAAASPE  |

**Table S3. Spacer between cleavage site and first cysteine of the ligand is hypervariable.**

| Subfamily                                                  | Name           | Residues between cleavage site and first cysteine | Length |
|------------------------------------------------------------|----------------|---------------------------------------------------|--------|
| Activin                                                    | CeTIG-3        | NAPNFDVMVFQPNTVTAGTSD                             | 21     |
| Activin                                                    | DmActivin-beta | RRAVD                                             | 5      |
| Activin                                                    | DmMyoglianin   | SVYMD                                             | 5      |
| Activin                                                    | MmBmp3         | STGILLPLQNNELPGAIEYQYKEEGAWEEKPYKSLQTQPPEKSRN     | 80     |
| Activin                                                    | MmGdf10        | KKKORKGSHOKGOTLOFDEOTLKKARRKOWVEPRN               | 36     |
| Activin                                                    | MmGdf11        | KKKDQDTFTAASSQVLDLDFDEKTMQKARRRQWDEPRV            | 36     |
| Activin                                                    | MmInhba        | NLGLD                                             | 5      |
| Activin                                                    | MmInhbb        | RGLE                                              | 4      |
| Activin                                                    | MmInhbc        | KRGLE                                             | 5      |
| Activin                                                    | MmInhbe        | RGID                                              | 4      |
| Activin                                                    | MmMstn         | TPT                                               | 3      |
| Activin                                                    | MmMstn         | DFGLD                                             | 5      |
| BMP                                                        | CeDBL-1        | SAQTGNSEKRNKGRKHHNTEAESNL                         | 27     |
| BMP                                                        | CeTIG-2        | KGLYVDFDILGWKQWVIAPEGFSFY                         | 26     |
| BMP                                                        | DmDPP          | QPRRPTRRNHDDT                                     | 14     |
| BMP                                                        | DmGBB          | SASHPRKRKKSVPNNVPLLEPMESTRS                       | 28     |
| BMP                                                        | DmSCW          | DLEKRRAGGGSPPPPPPPVDLYRPPQS                       | 28     |
| BMP                                                        | MmBmp2         | QAKHKQRKRLKSS                                     | 13     |
| BMP                                                        | MmBmp4         | SPKHPQRSRKKNKN                                    | 15     |
| BMP                                                        | MmBmp5         | AASKRKNQNRNKSNSHQDPSRMPSAGDYNTSEQKQA              | 36     |
| BMP                                                        | MmBmp6         | SASSRRRQQSRNRSTQSQDVSRGSGSSDYNGSELKTA             | 37     |
| BMP                                                        | MmBmp7         | STGGKQRSQNRSKTPKNQEALRMASVAENSSSDQRQA             | 37     |
| BMP                                                        | MmBmp8a        | AARPLKRRQPKKTNELPHPNKLPGLFDDGHGSRGREV             | 37     |
| BMP                                                        | MmBmp8b        | PLKKKQLNQLNQLPHSNKHLGILDDGHGSHGREV                | 34     |
| BMP                                                        | MmBmp10        | NAKGNV                                            | 6      |
| BMP                                                        | MmBmp15        | QA                                                | 2      |
| BMP                                                        | MmGdf1         | LHVSFREVGVHRWVIAPRGFLANF                          | 24     |
| BMP                                                        | MmGdf2         | STGASSH                                           | 7      |
| BMP                                                        | MmGdf3         | AAISVPKGF                                         | 9      |
| BMP                                                        | MmGdf5         | RAPLANRQGKRPSKNLKR                                | 19     |
| BMP                                                        | MmGdf6         | KPLHVNFKELGWDDWIIAPLEYEAYH                        | 26     |
| BMP                                                        | MmGdf7         | SR                                                | 2      |
| BMP                                                        | MmGdf9         | GQKAIRSEAKGPLLTASFNLSEYFKQFLFPQNE                 | 33     |
| BMP                                                        | MmNodal        | RHHLPPDRSQL                                       | 10     |
| Unexpected conservation between MmNodal and CeDBL-1 in red |                |                                                   |        |
| TGF-β                                                      | CeDAF-7        | SHAKPV                                            | 6      |
| TGF-β                                                      | CeUNC-129      | ERIANEELANDVRVLLQNKNR                             | 22     |
| TGF-β                                                      | DmDawdle       | KSRQKRSIN                                         | 9      |
| TGF-β                                                      | DmMaverick     | KDKWTNN                                           | 7      |
| TGF-β                                                      | MmAmh          | SAGTGTGDP                                         | 9      |
| TGF-β                                                      | MmGdf15        | SAHAHPRDS                                         | 9      |
| TGF-β                                                      | MmInha         | STPSVPWPWSPAALRLLQRPPEEPAAHAF                     | 29     |
| TGF-β                                                      | MmLefty1       | FAAQGTPDGKGQGEPQLELHTLDLKDYGAAQGN                 | 32     |
| TGF-β                                                      | MmLefty2       | FAAQGTPDGKGQGEPQLELHTLDLKDYGAAQGN                 | 32     |
| TGF-β                                                      | MmTgfb1        | ALDTNY                                            | 6      |
| TGF-β                                                      | MmTgfb2        | ALDAAY                                            | 6      |
| TGF-β                                                      | MmTgfb3        | ALDTNY                                            | 6      |
| outgroup                                                   | MmGdnf         | NRQAAAASPENSRGKGRRGQRGKNRG                        | 26     |

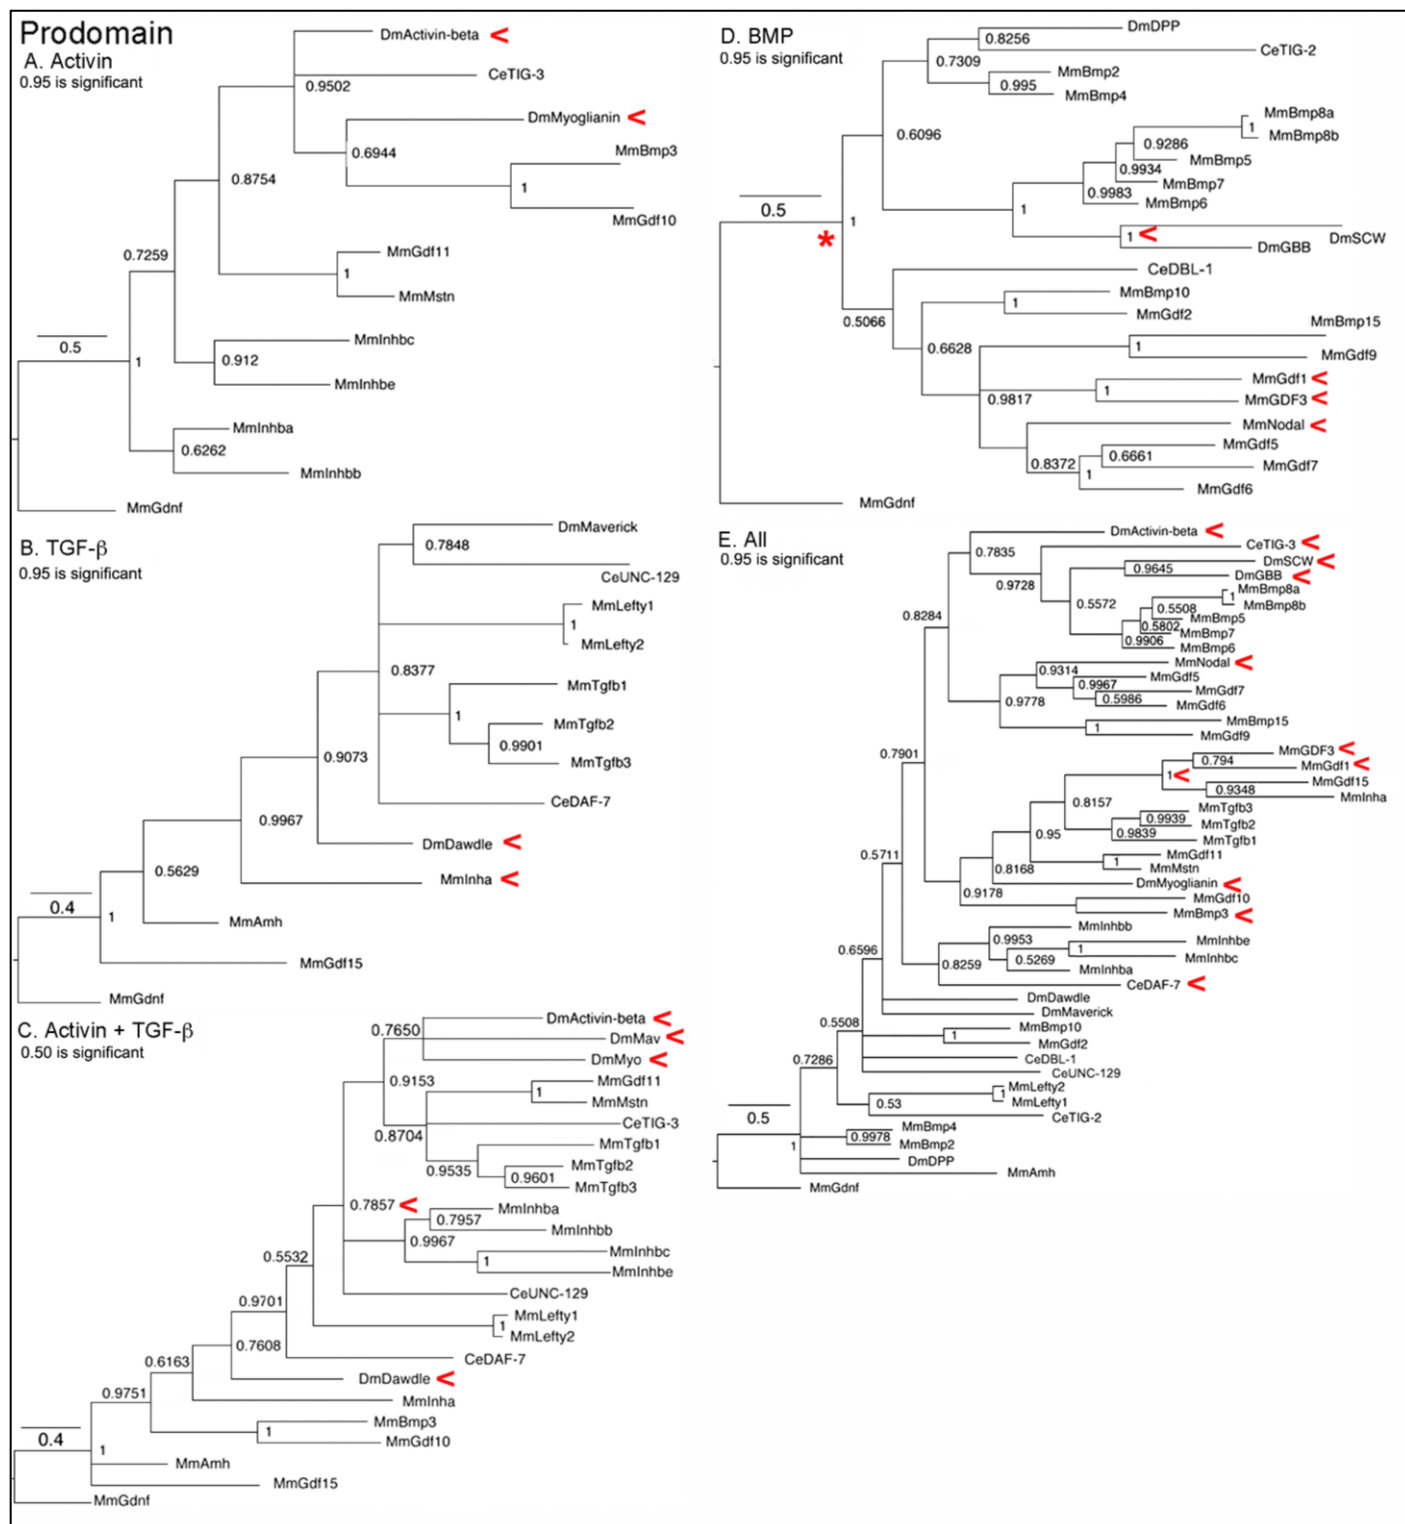

**Fig. S1. Prodomain trees.** Trees for this domain are displayed as in Fig. 1. Red arrowheads indicate a cluster that may reflect common regulation. For every tree except Activin+TGF- $\beta$  nodes above 0.95 are significant. For Activin+TGF- $\beta$  nodes above 0.50 are significant. A) Activin. The significant cluster of Activin and Myoglianin



is unexpected. B) TGF- $\beta$ . The significant cluster of Dawdle and Inhibin- $\alpha$  was unexpected. C) Activin+TGF- $\beta$ . The significant cluster of Activin, Maverick and Myoglianin that is clustered with the four Inhibin- $\beta$  proteins and Dawdle's location near Inhibin- $\alpha$  were unexpected but consistent with cysteine conservation in the "Association region" and  $\beta$ 8. D) BMP. The significant cluster of Gbb/Screw in all trees was unexpected. The cluster of heterodimerizing Nodal and GDF1/GDF3 was expected. Red asterisk indicates node leading to two symmetric secondary clusters. E) All family members. The not quite significant cross-subfamily cluster of Activin, TIG-3, Gbb and Screw with Nodal was unexpected but three are known to heterodimerize and two have conserved cysteines. The absolute cluster of GDF3/GDF1 with GDF15/Inhibin- $\alpha$  and this group's not quite significant cluster with Myoglianin was unexpected. The not quite significant cluster of DAF-7 with the four Inhibin- $\beta$  proteins was unexpected but is consistent with "Association region" cysteine conservation. The cluster of BMP3/GDF10 with Myoglianin was unexpected.

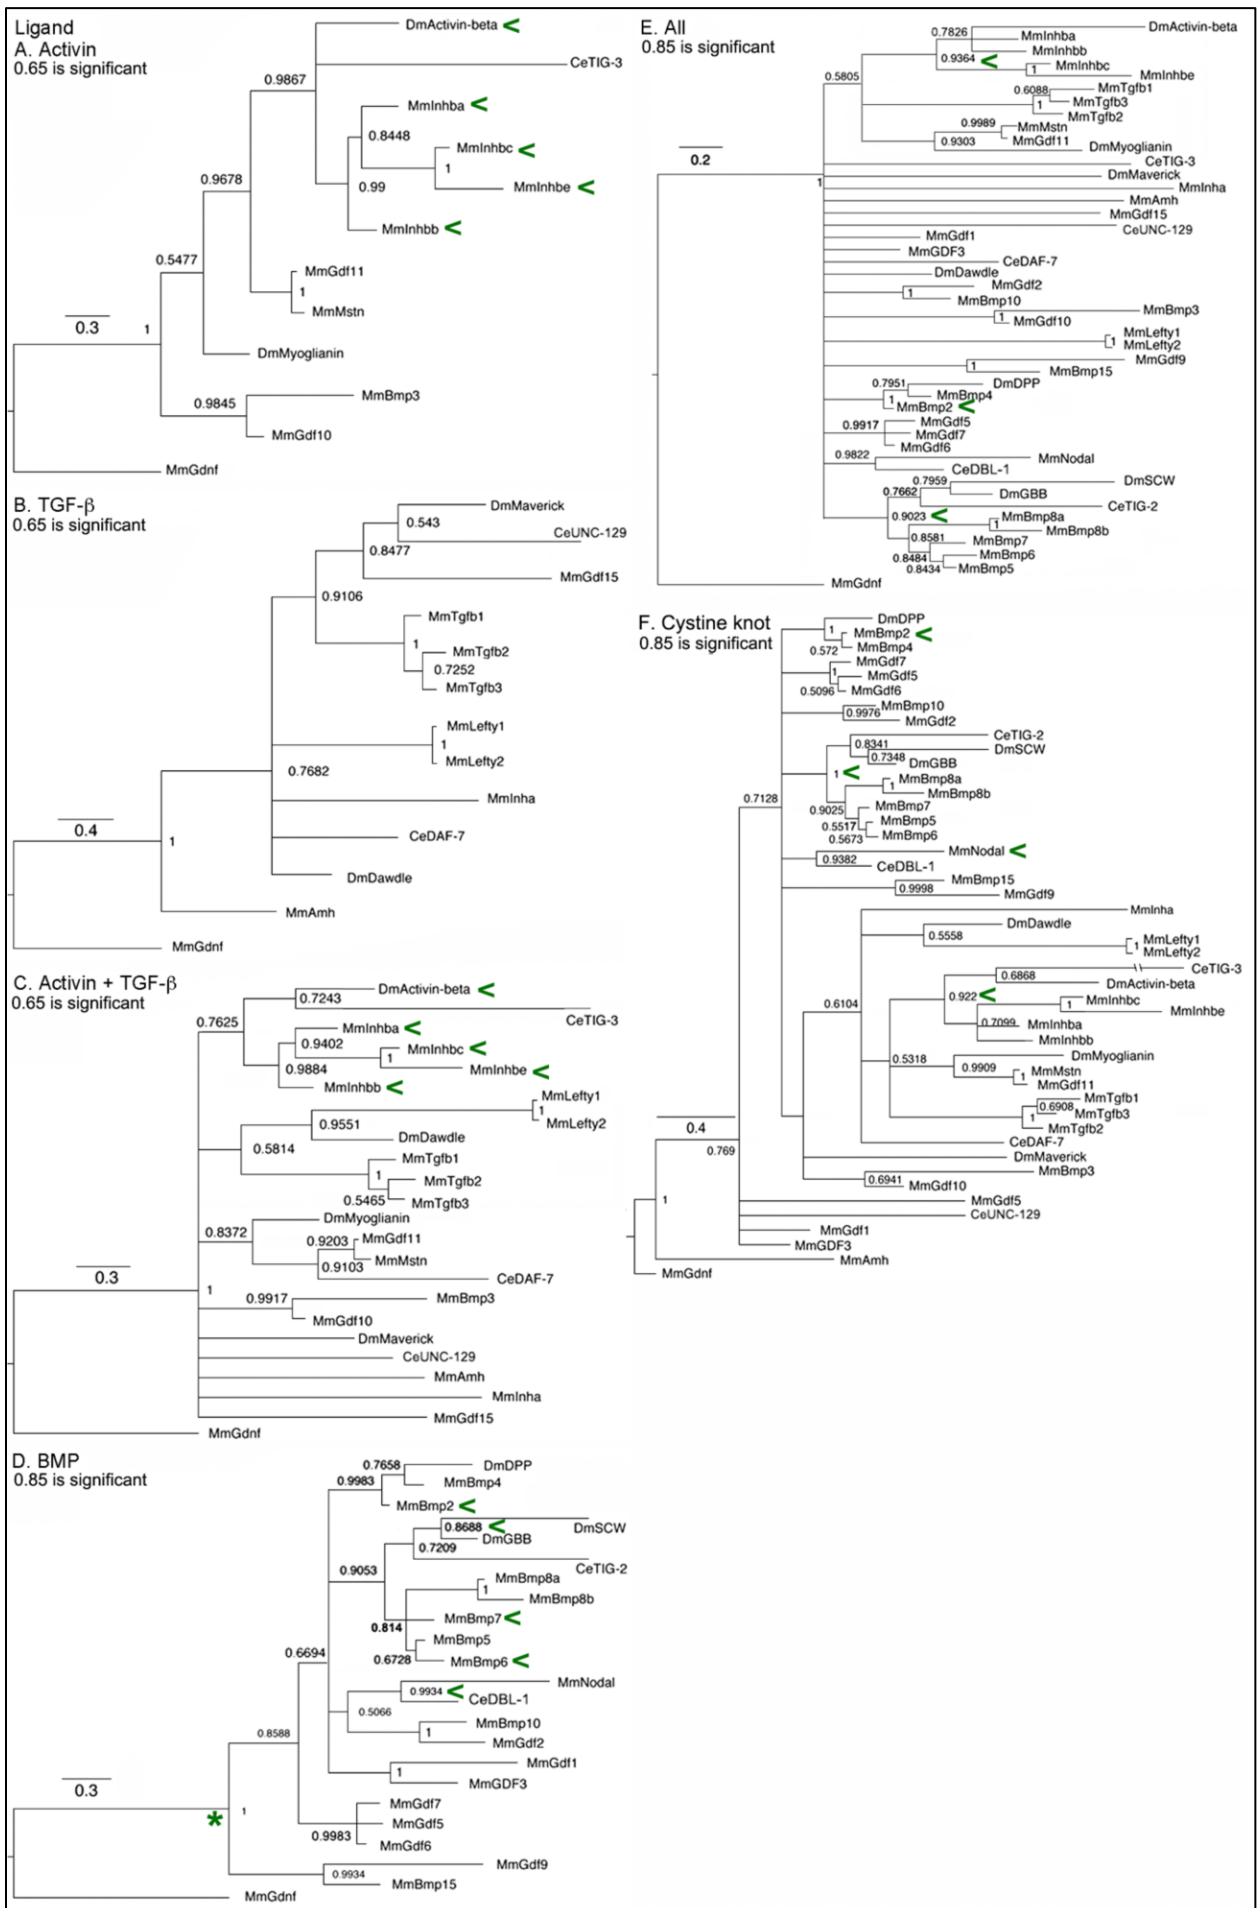

**Fig. S2. Ligand trees.** Trees for this domain are displayed as in Fig. 1. Green arrowheads indicate a cluster that may reflect common function. For Activin, TGF- $\beta$  and Activin+TGF- $\beta$  nodes above 0.65 are significant. For BMP subfamily and All family members trees nodes above 0.85 are significant. A) Activin. The significant cluster of Activin and the four Inhibin- $\beta$  proteins was expected. B) TGF- $\beta$ . The significant clusters of TGF- $\beta$ 1-3 and Lefty1,2 were expected. C) Activin+TGF- $\beta$ . The significant cluster of Activin and the four Inhibin- $\beta$  proteins was expected. D) BMP. The significant cluster of BMP2-8a,b with Gbb/Screw was expected and consistent with functional heterodimers of BMP2-BMP6 and BMP2-BMP7 that have been reported. The significant cluster of Nodal and DBL-1 was unexpected. Green asterisk indicates node leading to two asymmetric secondary clusters. E) All family members. Several significant clusters are expected such as the four Inhibin- $\beta$  proteins and Dpp/BMP2/BMP4. A significant cluster of Nodal and DBL-1 was unexpected. F) Cystine knot nodes above 0.85 are significant. Several significant clusters are expected such as Activin with four Inhibin- $\beta$  proteins, Dpp/BMP2/BMP4 and Gbb/Screw/BMP5-8a,b. A significant cluster of Nodal and DBL-1 was unexpected.



Myostatin/GDF11 was expected. B) TGF- $\beta$ . The significant clusters of TGF- $\beta$ 1-3 and Lefty1,2 were expected. C) Activin+TGF- $\beta$ . The significant cluster of Myoglianin and Myostatin/GDF11 was expected. D) BMP. Clustering of GBB/Screw, BMP10-GDF9, BMP15-GDF9 and Nodal-GDF1/GDF3 are consistent with heterodimerization that has been reported. Green asterisk indicates node leading to two asymmetric secondary clusters. E) All family members. The not quite significant clustering of BMP3 and GDF1 with all of the BMP subfamily proteins was unexpected. The not quite significant cluster between Nodal and GDF1/GDF3 was expected.

|                |     |                                                                                                                                                                                                                                                                                                                                                                                                                                                                                                                   |  |
|----------------|-----|-------------------------------------------------------------------------------------------------------------------------------------------------------------------------------------------------------------------------------------------------------------------------------------------------------------------------------------------------------------------------------------------------------------------------------------------------------------------------------------------------------------------|--|
|                |     | --α1----- -LatencyLasso- ----α2-----                                                                                                                                                                                                                                                                                                                                                                                                                                                                              |  |
| MmBmp3         | 124 | -----                                                                                                                                                                                                                                                                                                                                                                                                                                                                                                             |  |
| MmGdf10        | 123 | -----                                                                                                                                                                                                                                                                                                                                                                                                                                                                                                             |  |
| CeTIG-3        | 1   | -----                                                                                                                                                                                                                                                                                                                                                                                                                                                                                                             |  |
| DmMyoglianin   | 205 | DS <sup>1</sup> EST <sup>2</sup> KMH <sup>3</sup> ILM <sup>4</sup> RL <sup>5</sup> NE <sup>6</sup> KK <sup>7</sup> LP <sup>8</sup> NT <sup>9</sup> TK <sup>10</sup> PS <sup>11</sup> V <sup>12</sup> PQ <sup>13</sup> NI <sup>14</sup> ID <sup>15</sup> NY <sup>16</sup> -RD <sup>17</sup> YN <sup>18</sup> ASS <sup>19</sup> KT <sup>20</sup> TV <sup>21</sup> WN <sup>22</sup> R <sup>23</sup> ME <sup>24</sup> S <sup>25</sup> DES <sup>26</sup> H                                                             |  |
| MmGdf11        | 72  | LR <sup>1</sup> EST <sup>2</sup> KS <sup>3</sup> QIL <sup>4</sup> SK <sup>5</sup> LR <sup>6</sup> KE <sup>7</sup> AP <sup>8</sup> NI <sup>9</sup> S <sup>10</sup> RE <sup>11</sup> V <sup>12</sup> K <sup>13</sup> QL <sup>14</sup> EP <sup>15</sup> -K <sup>16</sup> AP <sup>17</sup> PL <sup>18</sup> Q <sup>19</sup> Q <sup>20</sup> IL <sup>21</sup> DL <sup>22</sup> -----H <sup>23</sup> DF <sup>24</sup> Q <sup>25</sup> G <sup>26</sup> DA                                                                |  |
| MmMstn         | 52  | SR <sup>1</sup> TE <sup>2</sup> AT <sup>3</sup> KI <sup>4</sup> QIL <sup>5</sup> SK <sup>6</sup> LR <sup>7</sup> ET <sup>8</sup> AP <sup>9</sup> NI <sup>10</sup> SK <sup>11</sup> DA <sup>12</sup> IR <sup>13</sup> QL <sup>14</sup> EP <sup>15</sup> -R <sup>16</sup> AP <sup>17</sup> PL <sup>18</sup> RE <sup>19</sup> LID <sup>20</sup> Q-----Y <sup>21</sup> D <sup>22</sup> WORD <sup>23</sup> DD                                                                                                          |  |
| DmActivin-beta | 369 | VR <sup>1</sup> EST <sup>2</sup> KR <sup>3</sup> QIL <sup>4</sup> TK <sup>5</sup> LG <sup>6</sup> SH <sup>7</sup> K <sup>8</sup> PN <sup>9</sup> V <sup>10</sup> SH <sup>11</sup> PK <sup>12</sup> Q <sup>13</sup> FW <sup>14</sup> -ET <sup>15</sup> IY <sup>16</sup> -----R <sup>17</sup> Y <sup>18</sup> D <sup>19</sup> G <sup>20</sup> GR                                                                                                                                                                    |  |
| MmGdnf         | 92  | DV <sup>1</sup> MD <sup>2</sup> FT <sup>3</sup> QAT <sup>4</sup> IK <sup>5</sup> R---L <sup>6</sup> K <sup>7</sup> RS <sup>8</sup> PD <sup>9</sup> KQ---A <sup>10</sup> A <sup>11</sup> LP <sup>12</sup> -RR <sup>13</sup> ER-----                                                                                                                                                                                                                                                                                |  |
| MmInhba        | 53  | EM <sup>1</sup> VE <sup>2</sup> AV <sup>3</sup> KK <sup>4</sup> HL <sup>5</sup> N <sup>6</sup> ML <sup>7</sup> HL <sup>8</sup> KK <sup>9</sup> RP <sup>10</sup> DV <sup>11</sup> TP <sup>12</sup> VP <sup>13</sup> KA <sup>14</sup> AL <sup>15</sup> -N <sup>16</sup> AI <sup>17</sup> R-----K <sup>18</sup> TH <sup>19</sup> V <sup>20</sup> G <sup>21</sup> K                                                                                                                                                   |  |
| MmInhbb        | 77  | DF <sup>1</sup> EA <sup>2</sup> VR <sup>3</sup> KR <sup>4</sup> HL <sup>5</sup> SL <sup>6</sup> QL <sup>7</sup> GR <sup>8</sup> PN <sup>9</sup> ITH <sup>10</sup> AV <sup>11</sup> PK <sup>12</sup> AA <sup>13</sup> V <sup>14</sup> -T <sup>15</sup> AL <sup>16</sup> R-----K <sup>17</sup> TH <sup>18</sup> AG <sup>19</sup> K                                                                                                                                                                                  |  |
| MmInhbc        | 42  | LL <sup>1</sup> DL <sup>2</sup> LAK <sup>3</sup> SI <sup>4</sup> LD <sup>5</sup> KL <sup>6</sup> HL <sup>7</sup> SR <sup>8</sup> PI <sup>9</sup> LS <sup>10</sup> RP <sup>11</sup> VS <sup>12</sup> RG <sup>13</sup> AK <sup>14</sup> -T <sup>15</sup> AL <sup>16</sup> Q-----R <sup>17</sup> Y <sup>18</sup> RG <sup>19</sup> PR                                                                                                                                                                                 |  |
| MmInhbe        | 42  | LV <sup>1</sup> LE <sup>2</sup> LAK <sup>3</sup> Q <sup>4</sup> ILE <sup>5</sup> GL <sup>6</sup> HT <sup>7</sup> SR <sup>8</sup> PR <sup>9</sup> IT <sup>10</sup> RP <sup>11</sup> LQ <sup>12</sup> AA <sup>13</sup> LT <sup>14</sup> -R <sup>15</sup> AL <sup>16</sup> R-----R <sup>17</sup> Y <sup>18</sup> Q <sup>19</sup> PK <sup>20</sup> S                                                                                                                                                                  |  |
|                |     | end straitjacket--β1--                                                                                                                                                                                                                                                                                                                                                                                                                                                                                            |  |
| MmBmp3         | 124 | -----                                                                                                                                                                                                                                                                                                                                                                                                                                                                                                             |  |
| MmGdf10        | 123 | -----                                                                                                                                                                                                                                                                                                                                                                                                                                                                                                             |  |
| CeTIG-3        | 1   | -----                                                                                                                                                                                                                                                                                                                                                                                                                                                                                                             |  |
| DmMyoglianin   | 264 | S <sup>1</sup> IND <sup>2</sup> TY <sup>3</sup> GD <sup>4</sup> -----H <sup>5</sup> IM <sup>6</sup> T <sup>7</sup> DE <sup>8</sup> DE <sup>9</sup> SS <sup>10</sup> SS <sup>11</sup> Q <sup>12</sup> M <sup>13</sup> Q <sup>14</sup> G <sup>15</sup> DD <sup>16</sup> AN-----                                                                                                                                                                                                                                     |  |
| MmGdf11        | 122 | Q <sup>1</sup> PED <sup>2</sup> F <sup>3</sup> LEED <sup>4</sup> -----E <sup>5</sup> Y <sup>6</sup> HAT <sup>7</sup> TET <sup>8</sup> VI <sup>9</sup> SM <sup>10</sup> AQ-----E <sup>11</sup> T <sup>12</sup> DP <sup>13</sup> AV <sup>14</sup> Q <sup>15</sup> TD                                                                                                                                                                                                                                                |  |
| MmMstn         | 102 | S <sup>1</sup> -SD <sup>2</sup> GS <sup>3</sup> LEDD <sup>4</sup> -----D <sup>5</sup> Y <sup>6</sup> HAT <sup>7</sup> TET <sup>8</sup> II <sup>9</sup> MT <sup>10</sup> P-----E <sup>11</sup> S <sup>12</sup> DF <sup>13</sup> LM <sup>14</sup> Q <sup>15</sup> AD                                                                                                                                                                                                                                                |  |
| DmActivin-beta | 411 | W <sup>1</sup> IP <sup>2</sup> NN <sup>3</sup> AF <sup>4</sup> GS <sup>5</sup> -----S <sup>6</sup> G <sup>7</sup> KN <sup>8</sup> LD <sup>9</sup> Q <sup>10</sup> K <sup>11</sup> TI <sup>12</sup> K <sup>13</sup> RA <sup>14</sup> FA <sup>15</sup> SP <sup>16</sup> GS <sup>17</sup> HL <sup>18</sup> F <sup>19</sup> NG <sup>20</sup> R <sup>21</sup> GG <sup>22</sup> RT <sup>23</sup> D <sup>24</sup> Q <sup>25</sup> R <sup>26</sup> SER <sup>27</sup> DP <sup>28</sup> SH <sup>29</sup> HK <sup>30</sup> Y |  |
| MmGdnf         |     | -----                                                                                                                                                                                                                                                                                                                                                                                                                                                                                                             |  |
| MmInhba        | 95  | V <sup>1</sup> GEN <sup>2</sup> GY <sup>3</sup> VE <sup>4</sup> IED <sup>5</sup> D <sup>6</sup> IG <sup>7</sup> RA <sup>8</sup> EM <sup>9</sup> NEL <sup>10</sup> ME <sup>11</sup> QT <sup>12</sup> SE <sup>13</sup> II <sup>14</sup> FA <sup>15</sup> ES <sup>16</sup> G-----T <sup>17</sup> --A                                                                                                                                                                                                                 |  |
| MmInhbb        | 119 | V <sup>1</sup> RED <sup>2</sup> GR <sup>3</sup> VE <sup>4</sup> I <sup>5</sup> PH <sup>6</sup> LD <sup>7</sup> G <sup>8</sup> HAS <sup>9</sup> PG <sup>10</sup> AD <sup>11</sup> G <sup>12</sup> Q <sup>13</sup> ERV <sup>14</sup> SE <sup>15</sup> II <sup>16</sup> SA <sup>17</sup> ET <sup>18</sup> D <sup>19</sup> GLA-----S <sup>20</sup> --S                                                                                                                                                                |  |
| MmInhbc        | 84  | RE <sup>1</sup> T---L <sup>2</sup> LE <sup>3</sup> H-----D <sup>4</sup> QR <sup>5</sup> EE <sup>6</sup> YE <sup>7</sup> II <sup>8</sup> S <sup>9</sup> FAD <sup>10</sup> TL <sup>11</sup> SS-----I <sup>12</sup> --N                                                                                                                                                                                                                                                                                              |  |
| MmInhbe        | 84  | V <sup>1</sup> --P-----G <sup>2</sup> N---RE <sup>3</sup> K <sup>4</sup> V <sup>5</sup> IS <sup>6</sup> FAT <sup>7</sup> II <sup>8</sup> DKS-----T <sup>9</sup> ST <sup>10</sup> Y                                                                                                                                                                                                                                                                                                                                |  |
|                |     | begin arm-β2--- -β3--                                                                                                                                                                                                                                                                                                                                                                                                                                                                                             |  |
| MmBmp3         | 124 | -----NIL <sup>1</sup> SA <sup>2</sup> TI <sup>3</sup> YF <sup>4</sup> YV <sup>5</sup> GEL <sup>6</sup> VNI <sup>7</sup> ---SL <sup>8</sup> SC                                                                                                                                                                                                                                                                                                                                                                     |  |
| MmGdf10        | 123 | -----MIL <sup>1</sup> TA <sup>2</sup> AF <sup>3</sup> HY <sup>4</sup> SE <sup>5</sup> PP <sup>6</sup> RP <sup>7</sup> PR <sup>8</sup> AE <sup>9</sup> VFC                                                                                                                                                                                                                                                                                                                                                         |  |
| CeTIG-3        | 17  | -----IT <sup>1</sup> LE <sup>2</sup> PN <sup>3</sup> R <sup>4</sup> KS <sup>5</sup> WT <sup>6</sup> CT <sup>7</sup> PES-                                                                                                                                                                                                                                                                                                                                                                                          |  |
| DmMyoglianin   | 330 | SI <sup>1</sup> YIF <sup>2</sup> PEE <sup>3</sup> I <sup>4</sup> Q <sup>5</sup> PH <sup>6</sup> VR <sup>7</sup> NR <sup>8</sup> K <sup>9</sup> VD <sup>10</sup> V <sup>11</sup> RF <sup>12</sup> QI-----D <sup>13</sup> SS <sup>14</sup> Y <sup>15</sup> DL <sup>16</sup> SY <sup>17</sup> AT <sup>18</sup> HL <sup>19</sup> YL--R <sup>20</sup> Q <sup>21</sup> WD <sup>22</sup> W <sup>23</sup> SA <sup>24</sup> HQ <sup>25</sup> P                                                                             |  |
| MmGdf11        | 179 | -----W <sup>1</sup> V <sup>2</sup> YL <sup>3</sup> RP <sup>4</sup> V <sup>5</sup> PR                                                                                                                                                                                                                                                                                                                                                                                                                              |  |
| MmMstn         | 158 | -----W <sup>1</sup> I <sup>2</sup> YL <sup>3</sup> RP <sup>4</sup> V <sup>5</sup> KT                                                                                                                                                                                                                                                                                                                                                                                                                              |  |
| DmActivin-beta | 643 | EI <sup>1</sup> IT <sup>2</sup> FA <sup>3</sup> EE <sup>4</sup> GT---Q <sup>5</sup> Y <sup>6</sup> R <sup>7</sup> Q <sup>8</sup> Y <sup>9</sup> RI <sup>10</sup> LE <sup>11</sup> FS <sup>12</sup> AQ <sup>13</sup> NR <sup>14</sup> RV <sup>15</sup> PS <sup>16</sup> Q <sup>17</sup> LS <sup>18</sup> IRS <sup>19</sup> Q <sup>20</sup> TH <sup>21</sup> IR <sup>22</sup> ID <sup>23</sup> K <sup>24</sup> PH <sup>25</sup> SL <sup>26</sup> WE <sup>27</sup> KA <sup>28</sup> KS                               |  |
| MmGdnf         |     | -----                                                                                                                                                                                                                                                                                                                                                                                                                                                                                                             |  |
| MmInhba        | 153 | -----AE <sup>1</sup> V-----W <sup>2</sup> L <sup>3</sup> FL <sup>4</sup> M <sup>5</sup> VP <sup>6</sup> KA                                                                                                                                                                                                                                                                                                                                                                                                        |  |
| MmInhbb        | 180 | -----AS <sup>1</sup> L-----W <sup>2</sup> Y <sup>3</sup> YL <sup>4</sup> K <sup>5</sup> LL <sup>6</sup> PY                                                                                                                                                                                                                                                                                                                                                                                                        |  |
| MmInhbc        | 132 | -----TR <sup>1</sup> F-----M <sup>2</sup> FF <sup>3</sup> V <sup>4</sup> Q <sup>5</sup> FP <sup>6</sup> HN                                                                                                                                                                                                                                                                                                                                                                                                        |  |
| MmInhbe        | 125 | -----AR <sup>1</sup> -----L <sup>2</sup> WL <sup>3</sup> RP <sup>4</sup> PP <sup>5</sup> S                                                                                                                                                                                                                                                                                                                                                                                                                        |  |
|                |     | -α3- ----β4--                                                                                                                                                                                                                                                                                                                                                                                                                                                                                                     |  |
| MmBmp3         | 145 | P-E---PQ <sup>1</sup> GCS <sup>2</sup> HHT <sup>3</sup> QR <sup>4</sup> Q-----HI <sup>5</sup> Q <sup>6</sup> ID <sup>7</sup> SA <sup>8</sup> W <sup>9</sup> L <sup>10</sup> KS <sup>11</sup> NQ <sup>12</sup> SQ <sup>13</sup> LL <sup>14</sup> G-----                                                                                                                                                                                                                                                            |  |
| MmGdf10        | 147 | K <sup>1</sup> PR <sup>2</sup> AK <sup>3</sup> -NAS <sup>4</sup> CR <sup>5</sup> LL <sup>6</sup> TP <sup>7</sup> GL-----P <sup>8</sup> AR <sup>9</sup> LH <sup>10</sup> IF <sup>11</sup> RS <sup>12</sup> LS <sup>13</sup> -Q <sup>14</sup> NT <sup>15</sup> AT <sup>16</sup> QG-----                                                                                                                                                                                                                             |  |
| CeTIG-3        | 34  | ---LV <sup>1</sup> KDC <sup>2</sup> F <sup>3</sup> QYS <sup>4</sup> INS <sup>5</sup> IN <sup>6</sup> HE <sup>7</sup> IL <sup>8</sup> SAS <sup>9</sup> LI <sup>10</sup> ID <sup>11</sup> PK <sup>12</sup> DN <sup>13</sup> SI <sup>14</sup> V <sup>15</sup> YEV <sup>16</sup> DEL <sup>17</sup> F-----                                                                                                                                                                                                             |  |
| DmMyoglianin   | 383 | G---L <sup>1</sup> LEE <sup>2</sup> IKK---Q <sup>3</sup> PR <sup>4</sup> K-----D <sup>5</sup> IV <sup>6</sup> VT <sup>7</sup> H <sup>8</sup> RA <sup>9</sup> IR <sup>10</sup> VA-----N <sup>11</sup> T                                                                                                                                                                                                                                                                                                            |  |
| MmGdf11        | 188 | -PAT-----V <sup>1</sup> YL <sup>2</sup> QL <sup>3</sup> L <sup>4</sup> R <sup>5</sup> L <sup>6</sup> K <sup>7</sup> PL <sup>8</sup> T <sup>9</sup> GEG <sup>10</sup> TAGG---G                                                                                                                                                                                                                                                                                                                                     |  |
| MmMstn         | 167 | -PTT-----V <sup>1</sup> F <sup>2</sup> V <sup>3</sup> QL <sup>4</sup> L <sup>5</sup> R <sup>6</sup> L <sup>7</sup> IK <sup>8</sup> PM <sup>9</sup> KD-----                                                                                                                                                                                                                                                                                                                                                        |  |
| DmActivin-beta | 699 | L <sup>1</sup> PE <sup>2</sup> KH <sup>3</sup> LL <sup>4</sup> NT <sup>5</sup> K <sup>6</sup> R <sup>7</sup> K <sup>8</sup> WG <sup>9</sup> ANK <sup>10</sup> PHH-----R <sup>11</sup> K <sup>12</sup> I <sup>13</sup> W <sup>14</sup> F <sup>15</sup> QL <sup>16</sup> ST <sup>17</sup> SI-----N <sup>18</sup> ITE <sup>19</sup> K                                                                                                                                                                                |  |
| MmGdnf         |     | -----                                                                                                                                                                                                                                                                                                                                                                                                                                                                                                             |  |
| MmInhba        | 165 | N---R-----T <sup>1</sup> RT-----K <sup>2</sup> V <sup>3</sup> T <sup>4</sup> IR <sup>5</sup> F <sup>6</sup> QQ <sup>7</sup> Q <sup>8</sup> K <sup>9</sup> HP <sup>10</sup> Q <sup>11</sup> GS <sup>12</sup> LD <sup>13</sup> TG <sup>14</sup> DE <sup>15</sup> AEE <sup>16</sup> EM                                                                                                                                                                                                                               |  |
| MmInhbb        | 192 | V <sup>1</sup> LE <sup>2</sup> KG-----S <sup>3</sup> RR-----K <sup>4</sup> V <sup>5</sup> R <sup>6</sup> V <sup>7</sup> K <sup>8</sup> Y <sup>9</sup> F <sup>10</sup> QE-----                                                                                                                                                                                                                                                                                                                                     |  |
| MmInhbc        | 144 | AT <sup>1</sup> QT-----V <sup>2</sup> NR <sup>3</sup> VL <sup>4</sup> LRP-----                                                                                                                                                                                                                                                                                                                                                                                                                                    |  |
| MmInhbe        | 135 | FP <sup>1</sup> GT-----Y <sup>2</sup> LR <sup>3</sup> F <sup>4</sup> RC <sup>5</sup> GT-----                                                                                                                                                                                                                                                                                                                                                                                                                      |  |
|                |     | ---β5- -β6-- --α4--- --β7--- no-β8                                                                                                                                                                                                                                                                                                                                                                                                                                                                                |  |
| MmBmp3         | 178 | -----H <sup>1</sup> LS <sup>2</sup> VD <sup>3</sup> V <sup>4</sup> RP <sup>5</sup> YR <sup>6</sup> DS <sup>7</sup> VS <sup>8</sup> W <sup>9</sup> LS <sup>10</sup> KD <sup>11</sup> IT <sup>12</sup> QL <sup>13</sup> R <sup>14</sup> K <sup>15</sup> AK <sup>16</sup> QNE---E <sup>17</sup> FL <sup>18</sup> IG <sup>19</sup> FN <sup>20</sup> ITS <sup>21</sup> RA <sup>22</sup> HE <sup>23</sup> LP                                                                                                            |  |
| MmGdf10        | 182 | -----L <sup>1</sup> RG <sup>2</sup> AM <sup>3</sup> AL <sup>4</sup> TP <sup>5</sup> PP <sup>6</sup> RG <sup>7</sup> LW <sup>8</sup> Q <sup>9</sup> ARD <sup>10</sup> ISS <sup>11</sup> IK <sup>12</sup> AARR <sup>13</sup> DG---E <sup>14</sup> LL <sup>15</sup> SA <sup>16</sup> QL <sup>17</sup> DT <sup>18</sup> GE <sup>19</sup> KD <sup>20</sup> PG                                                                                                                                                          |  |
| CeTIG-3        | 76  | ---GEL <sup>1</sup> QYV---DR <sup>2</sup> FE <sup>3</sup> IR <sup>4</sup> -ET <sup>5</sup> LD <sup>6</sup> KY <sup>7</sup> H <sup>8</sup> FD <sup>9</sup> ISH <sup>10</sup> F <sup>11</sup> HK <sup>12</sup> WM <sup>13</sup> K <sup>14</sup> OK <sup>15</sup> SS <sup>16</sup> DKV---K <sup>17</sup> IE <sup>18</sup> IT <sup>19</sup> NS <sup>20</sup> NT-----                                                                                                                                                  |  |
| DmMyoglianin   | 410 | TS <sup>1</sup> FN <sup>2</sup> PK <sup>3</sup> V <sup>4</sup> K <sup>5</sup> MF <sup>6</sup> FR <sup>7</sup> HS <sup>8</sup> PS <sup>9</sup> GL <sup>10</sup> QW <sup>11</sup> AV <sup>12</sup> DL <sup>13</sup> KS <sup>14</sup> LL <sup>15</sup> GN <sup>16</sup> LS <sup>17</sup> NMT <sup>18</sup> Q---E <sup>19</sup> EL <sup>20</sup> LK <sup>21</sup> -GAET-----                                                                                                                                          |  |
| MmGdf11        | 211 | GG <sup>1</sup> RR <sup>2</sup> H <sup>3</sup> IR <sup>4</sup> IR <sup>5</sup> SL <sup>6</sup> KIE <sup>7</sup> HS <sup>8</sup> RS <sup>9</sup> GH <sup>10</sup> W <sup>11</sup> QS <sup>12</sup> ID <sup>13</sup> F <sup>14</sup> Q <sup>15</sup> V <sup>16</sup> L <sup>17</sup> HS <sup>18</sup> W <sup>19</sup> FR <sup>20</sup> OP <sup>21</sup> -Q <sup>22</sup> SN <sup>23</sup> WG <sup>24</sup> IE <sup>25</sup> IN <sup>26</sup> AF <sup>27</sup> DP <sup>28</sup> SG                                   |  |
| MmMstn         | 184 | --G <sup>1</sup> TRY <sup>2</sup> TG <sup>3</sup> IR <sup>4</sup> SL <sup>5</sup> KLD <sup>6</sup> SP <sup>7</sup> GT <sup>8</sup> GI <sup>9</sup> W <sup>10</sup> QS <sup>11</sup> ID <sup>12</sup> V <sup>13</sup> KT <sup>14</sup> VL <sup>15</sup> Q <sup>16</sup> N <sup>17</sup> WL <sup>18</sup> K <sup>19</sup> OP <sup>20</sup> -E <sup>21</sup> SN <sup>22</sup> L <sup>23</sup> G <sup>24</sup> IE <sup>25</sup> KAL <sup>26</sup> DENG-----                                                           |  |
| DmActivin-beta | 737 | G--ID <sup>1</sup> KAI <sup>2</sup> L <sup>3</sup> FR <sup>4</sup> AS <sup>5</sup> FQ <sup>6</sup> W <sup>7</sup> DP <sup>8</sup> KN <sup>9</sup> L <sup>10</sup> GW <sup>11</sup> Q <sup>12</sup> K <sup>13</sup> FD <sup>14</sup> LT <sup>15</sup> DT <sup>16</sup> REW <sup>17</sup> YG <sup>18</sup> HT <sup>19</sup> S <sup>20</sup> HE <sup>21</sup> K <sup>22</sup> LR <sup>23</sup> LL <sup>24</sup> DC <sup>25</sup> TG <sup>26</sup> CGG-----                                                           |  |
| MmGdnf         |     | -----                                                                                                                                                                                                                                                                                                                                                                                                                                                                                                             |  |
| MmInhba        | 196 | GL <sup>1</sup> KGER <sup>2</sup> SE <sup>3</sup> LL <sup>4</sup> SE <sup>5</sup> KV <sup>6</sup> D <sup>7</sup> ARK <sup>8</sup> ST <sup>9</sup> WH <sup>10</sup> IF <sup>11</sup> VS <sup>12</sup> SS <sup>13</sup> OR <sup>14</sup> LL <sup>15</sup> DQ <sup>16</sup> -G <sup>17</sup> K <sup>18</sup> SS <sup>19</sup> LD <sup>20</sup> RI <sup>21</sup> ACE <sup>22</sup> QC <sup>23</sup> QE-----                                                                                                           |  |
| MmInhbb        | 210 | --Q <sup>1</sup> GH <sup>2</sup> DR <sup>3</sup> NN <sup>4</sup> V <sup>5</sup> VE <sup>6</sup> KK <sup>7</sup> DL <sup>8</sup> K <sup>9</sup> RS <sup>10</sup> GH <sup>11</sup> TF <sup>12</sup> PI <sup>13</sup> EA <sup>14</sup> Q <sup>15</sup> AL <sup>16</sup> FER <sup>17</sup> -G <sup>18</sup> ERR <sup>19</sup> LN <sup>20</sup> D <sup>21</sup> V <sup>22</sup> Q <sup>23</sup> DC <sup>24</sup> SC <sup>25</sup> QE-----                                                                              |  |
| MmInhbc        | 158 | --Y <sup>1</sup> DT <sup>2</sup> N <sup>3</sup> L <sup>4</sup> T <sup>5</sup> LS <sup>6</sup> QY <sup>7</sup> V <sup>8</sup> QV <sup>9</sup> NAS <sup>10</sup> GW <sup>11</sup> Y <sup>12</sup> QL <sup>13</sup> LG <sup>14</sup> PE <sup>15</sup> AQA <sup>16</sup> ACS <sup>17</sup> -G <sup>18</sup> HL <sup>19</sup> TLE <sup>20</sup> T---V <sup>21</sup> PS <sup>22</sup> QVA-----                                                                                                                          |  |
| MmInhbe        | 149 | --TR <sup>1</sup> CR <sup>2</sup> GF <sup>3</sup> RT <sup>4</sup> FL <sup>5</sup> AE <sup>6</sup> HQT <sup>7</sup> TSS <sup>8</sup> GH <sup>9</sup> ALT <sup>10</sup> PS <sup>11</sup> SG <sup>12</sup> LR <sup>13</sup> SED <sup>14</sup> S <sup>15</sup> -G <sup>16</sup> V <sup>17</sup> V <sup>18</sup> KL <sup>19</sup> Q <sup>20</sup> E <sup>21</sup> FR <sup>22</sup> PL <sup>23</sup> DL <sup>24</sup> NS                                                                                                |  |
|                |     | no bowtie -β9--- no-β9'- --β10- no-α5                                                                                                                                                                                                                                                                                                                                                                                                                                                                             |  |
| MmBmp3         | 226 | K <sup>1</sup> R <sup>2</sup> ML <sup>3</sup> FF <sup>4</sup> PE <sup>5</sup> PY <sup>6</sup> LV <sup>7</sup> YAND <sup>8</sup> A-----A <sup>9</sup> ISE <sup>10</sup> PES <sup>11</sup> V <sup>12</sup> SS <sup>13</sup> L <sup>14</sup> QR <sup>15</sup> HR <sup>16</sup> DF <sup>17</sup> TAG <sup>18</sup> TG---P                                                                                                                                                                                             |  |
| MmGdf10        | 230 | V <sup>1</sup> PR <sup>2</sup> PS <sup>3</sup> SH <sup>4</sup> MP <sup>5</sup> Y <sup>6</sup> LV <sup>7</sup> YAND <sup>8</sup> L-----A <sup>9</sup> ISE <sup>10</sup> PNS <sup>11</sup> V <sup>12</sup> AV <sup>13</sup> SL <sup>14</sup> Q <sup>15</sup> RY <sup>16</sup> DF <sup>17</sup> PAG <sup>18</sup> DFE <sup>19</sup> PGA <sup>20</sup> AP                                                                                                                                                             |  |
| CeTIG-3        | 124 | -----Q <sup>1</sup> N <sup>2</sup> INAL <sup>3</sup> S---V <sup>4</sup> LR-----                                                                                                                                                                                                                                                                                                                                                                                                                                   |  |
| DmMyoglianin   | 460 | -----W <sup>1</sup> M-----K <sup>2</sup> SL <sup>3</sup> V <sup>4</sup> VT <sup>5</sup> T <sup>6</sup> D <sup>7</sup> NT <sup>8</sup> SE <sup>9</sup> NP <sup>10</sup> TV <sup>11</sup> HIE <sup>12</sup> IG <sup>13</sup> S--                                                                                                                                                                                                                                                                                    |  |
| MmGdf11        | 265 | -----T <sup>1</sup> D <sup>2</sup> AV <sup>3</sup> TS-----L <sup>4</sup> GP <sup>5</sup> GA <sup>6</sup> EL <sup>7</sup> HP <sup>8</sup> FE <sup>9</sup> LR <sup>10</sup> V <sup>11</sup> LE <sup>12</sup> NT-----                                                                                                                                                                                                                                                                                                |  |
| MmMstn         | 236 | -----H <sup>1</sup> DL <sup>2</sup> AV <sup>3</sup> TF-----P <sup>4</sup> GP <sup>5</sup> GED <sup>6</sup> GL <sup>7</sup> N <sup>8</sup> PF <sup>9</sup> EV <sup>10</sup> K <sup>11</sup> VT <sup>12</sup> DP-----                                                                                                                                                                                                                                                                                               |  |
| DmActivin-beta | 790 | -----R <sup>1</sup> YS <sup>2</sup> L <sup>3</sup> HL <sup>4</sup> F <sup>5</sup> Q <sup>6</sup> TS <sup>7</sup> K <sup>8</sup> LR---G-----N <sup>9</sup> SS <sup>10</sup> D <sup>11</sup> YL <sup>12</sup> ST <sup>13</sup> NP <sup>14</sup> NR <sup>15</sup> PF <sup>16</sup> VL <sup>17</sup> HT <sup>18</sup> ESS <sup>19</sup> R--                                                                                                                                                                           |  |
| MmGdnf         |     | -----                                                                                                                                                                                                                                                                                                                                                                                                                                                                                                             |  |
| MmInhba        | 250 | -----S <sup>1</sup> GAS <sup>2</sup> LV <sup>3</sup> LL <sup>4</sup> G <sup>5</sup> K <sup>6</sup> K <sup>7</sup> K <sup>8</sup> KE <sup>9</sup> VD <sup>10</sup> GD <sup>11</sup> G <sup>12</sup> K <sup>13</sup> K <sup>14</sup> D <sup>15</sup> GS <sup>16</sup> DG <sup>17</sup> GLEE <sup>18</sup> E <sup>19</sup> KE <sup>20</sup> Q <sup>21</sup> SH <sup>22</sup> RP <sup>23</sup> FM <sup>24</sup> QAR <sup>25</sup> QSE--                                                                               |  |
| MmInhbb        | 262 | -----LA <sup>1</sup> V <sup>2</sup> VP <sup>3</sup> V <sup>4</sup> F <sup>5</sup> VD-----P <sup>6</sup> GE <sup>7</sup> ESH <sup>8</sup> RP <sup>9</sup> FF <sup>10</sup> V <sup>11</sup> QAR <sup>12</sup> LG--                                                                                                                                                                                                                                                                                                  |  |
| MmInhbc        | 207 | -----H <sup>1</sup> SSL <sup>2</sup> -IL <sup>3</sup> GW <sup>4</sup> FS <sup>5</sup> HR <sup>6</sup> PF <sup>7</sup> VAA <sup>8</sup> Q <sup>9</sup> VR <sup>10</sup> VE-----                                                                                                                                                                                                                                                                                                                                    |  |
| MmInhbe        | 200 | -----TA <sup>1</sup> AG-----L <sup>2</sup> PR <sup>3</sup> LL <sup>4</sup> LD <sup>5</sup> TAG <sup>6</sup> Q <sup>7</sup> RP <sup>8</sup> FE <sup>9</sup> L <sup>10</sup> KIR <sup>11</sup> ANE--                                                                                                                                                                                                                                                                                                                |  |

**Fig. S4. Expanded Activin subfamily prodomain alignment indicating structural conservation.** Sequences from Fig. 2 with no omissions, similar underlining and accurate numbering. Ungainly leaders and trailers were trimmed for brevity.



|            |     |                                                              |
|------------|-----|--------------------------------------------------------------|
|            |     | -----α1----- -LatencyLasso- -----α2----                      |
| CeUNC-129  | 15  | ---IANCAKVDV-----LINETTRDLHFKSSD---PNVTSFHRSSHT---           |
| CeDAF-7    | 19  | GLTFNCTNSGICIKMKQHRTEYKNEELDQLNKEAKKGLKPMDEPKSVYLEMY---R     |
| DmMaverick | 245 | -----SKRVDETRDKHLVLKGLGKKLDMRKVNISQAAYS-----S                |
| MmTgfb1    | 27  | AAG-LSTCKTDMELVKRKRIEATRGQILSKLRASPESSQGEVPPGPPEAVIALYNSTR   |
| MmTgfb2    | 18  | ALS-LSTCSTDMQFMKRRIEATRGQILSKLKTSPEDY-PEPEVPEVVISIYNSTR      |
| MmTgfb3    | 21  | SLS-LSTCTTDFGHIKKRVEATRGQILSKLRSTSPPEPS-V-MTHVPYQVIALYNSTR   |
| MmLefty1   | 20  | EAL-T-----GEO-----TLGSELQQLQDQPEVLDAKADVEGMVIPSHVRTQYV-      |
| MmLefty2   | 20  | AAM-T-----EQ-----VLSSLLQQLQSQATLDSADVEEMAIPTHVRSQYV-         |
| MmInha     | 204 | CSC-SGRPET-----                                              |
| DmDawdle   | 233 | CES-NRQVEHTEQLTHLRIEFYKQNTKTRKESKVSAAA-VEPKPIFDGM----        |
| MmGdf15    | 118 | AYR-VHRALLLTPTARPDITRPL-KRALSLRGPRALRLRL--TPPPDLA-----       |
| MmGdnf     |     | -----                                                        |
| MmAmh      | 351 | AAT-EREFPMTGHPASAPWAAGLQR-RVAVETQAAASELRDLPGLPPTAPPLLARL---- |
|            |     | end straitjacket--β1---                                      |
| CeUNC-129  | 53  | -----TEHMKNLNENFIDEDESNEDGNLVRAIEPAVGKFEGQEVLVFDVE           |
| CeDAF-7    | 76  | DLLEKDEQDM-----GVEMSFYAKD-----                               |
| DmMaverick | 282 | KYLEYLSRLR---SNQEKGSYNFNMFGASFT-----                         |
| MmTgfb1    | 86  | DRVAGESAD-----PEPEPEADYAKEV-----                             |
| MmTgfb2    | 76  | DLLEKASRRRAACERERSDEEYAKEV-----                              |
| MmTgfb3    | 78  | ELLEEMHGEREEGCTQETSESEYAKEI-----                             |
| MmLefty1   | 63  | ALLQHSASR---SRGKRFSQNLREVA-----                              |
| MmLefty2   | 63  | ALLQGSADR---SRGKRFSQNLREVA-----                              |
| MmInha     | 213 | -----                                                        |
| DmDawdle   | 285 | -TSSHPDDST---KNK-ELDDYARTS-----                              |
| MmGdf15    | 167 | ---MLPS-----GGTQLELR-----                                    |
| MmGdnf     |     | -----                                                        |
| MmAmh      | 405 | -LALCPNDSR---SSGDPLRALLL-----                                |
|            |     | begin arm --β2-- --α3-- --β3--                               |
| CeUNC-129  | 143 | TLKKIRVGGDENLE---EYK--VIMDATKS-VFDSYHLDAKQAVFRITREHSMRPHYA   |
| CeDAF-7    | 102 | -----NPSQLVAKEDVTND---LERSDLQALTLTSIEIPAK---                 |
| DmMaverick | 356 | --L--LRGEQDT-----MNILLHPLTNAQDANFHHDKIDEANVRMLLYSSSL---      |
| MmTgfb1    | 126 | -----DISH---SIY---MRENTSDIREAVPEPPLSRAEIRQRLKS---            |
| MmTgfb2    | 136 | SQV--LCGYLDAIPPTFYRPFYFRIVREDVST---MEKNASNVKAEFRVRLQNPK---   |
| MmTgfb3    | 126 | -----GITSKVFRFNVSS---VEKNGTNTFRAEFRVLRVNPNS---               |
| MmLefty1   | 95  | -----STHLLVFGMEQ---RLPPNSELVQAVLRVFOQEPVPR---                |
| MmLefty2   | 95  | -----STHLLVFGMEQ---RLPPNSELVQAVLRVFOQEPVPR---                |
| MmInha     | 213 | -----                                                        |
| DmDawdle   | 327 | -----SNPSMCFTKIID---ADAEGFDSTAVLWTFKNKQNR---                 |
| MmGdf15    |     | -----                                                        |
| MmGdnf     |     | -----                                                        |
| MmAmh      |     | -----                                                        |
|            |     | ---β4--- --β5-- --β6-- --α4---                               |
| CeUNC-129  | 249 | -----LDNEDREPIKRNKGNLSLSEEISSDVMQGEETSRREE---                |
| CeDAF-7    | 138 | GMLQDVQVQVYEKNE--DG-S-MGEMVTSGIFA--TK-GSERISIOLPIDTKSWFTIS   |
| DmMaverick | 441 | NSSQQLTKVYQLLSANRRRKITSRKIEFGNVGF--QETRTQWIEFD-VTKAVRSWLNKS  |
| MmTgfb1    | 163 | --SVEQHVELYQKYS---NNSWRYLGNELL---TPTDTPEWLSFD-VTGVRQWLNQG    |
| MmTgfb2    | 187 | ARVAEQRELYQILKSKDLTSPQRYLDSKV---KTRAEGEWLSFD-VTDVQEWLHHK     |
| MmTgfb3    | 161 | SKRTEQRLELFQILRPD--H-IAQRYLGGNLL---PTRGTAEWLSFD-VTDVREWLLRR  |
| MmLefty1   | 140 | SARARVTLEWLRFRD--GSGNRTA-LDSRLV---SIHESGWKAFD-VTEANFQWQLS    |
| MmLefty2   | 140 | SARARVTLEWLRVRE--GSGNRTA-LDSRLV---SIHESGWKAFD-VTEANFQWQLS    |
| MmInha     | 213 | -----                                                        |
| DmDawdle   | 370 | -TSAQQTIVVSEVEV--EQQKDSKYLAAATTAQSVNVQDEWMKID--LEWPKHWTSGH   |
| MmGdf15    |     | -----                                                        |
| MmGdnf     |     | -----                                                        |
| MmAmh      |     | -----                                                        |
|            |     | ---β7- --β8-----bowtie-----β9---                             |
| CeUNC-129  | 289 | -----                                                        |
| CeDAF-7    | 190 | PI-QGIFVKAMLDRNV-----ALHPQ                                   |
| DmMaverick | 498 | HENLGIE--IQCDKCKSIGA--RILSDFSPSTPPRSTASSDEHLNMPVLNIIGHGTLS   |
| MmTgfb1    | 212 | DGIQGFRESAHCSCDSKDNK-----LHVEING---I                         |
| MmTgfb2    | 243 | DRNLGFKISLHCPCCCTFVPSNNYIIPNKSEE-----LEARFAGIDGT             |
| MmTgfb3    | 216 | ESNLGLEISIHCPCHTFQPNGD-ILENVHEV-----MEIKFKGVDNE              |
| MmLefty1   | 192 | RP--R-----                                                   |
| MmLefty2   | 192 | RP--R-----                                                   |
| MmInha     | 213 | -----                                                        |
| DmDawdle   | 426 | EL--SHLIQITCGGCDVSDMEEIISVD-----                             |
| MmGdf15    |     | -----                                                        |
| MmGdnf     |     | -----                                                        |
| MmAmh      |     | -----                                                        |
|            |     | no-β9' --β10- --α5--                                         |
| CeUNC-129  | 289 | -----R---                                                    |
| CeDAF-7    | 211 | QTTADVDMRLQL-----S---TRPKG--S-RKRR---                        |
| DmMaverick | 554 | QQHGDADIHQIMLTNNRSDQYV-----HHRSNHDSWTW---                    |
| MmTgfb1    | 240 | SPKRRGDLGTIH-----DMNRFFLLMATPLERAQHLSSRRHR---                |
| MmTgfb2    | 285 | STYASGDQKTIKSTRKKTSGKTEHLLMLLPSYRLESQQSSRRKKR---             |
| MmTgfb3    | 257 | DDHGRGDLGRLK---KQKDHHNPHLLMMIPPHRLDSPGGGSRKKR---             |
| MmLefty1   | 195 | -----CPLLT-QVSVQ---REHLGPGTWSSHKLV---                        |
| MmLefty2   | 195 | -----CPLLT-QVSVQ---REHLGPGTWSSHKLV---                        |
| MmInha     | 213 | -----TFELVAHTRAR--APSAGE--RARR---                            |
| DmDawdle   | 451 | -----KDYRFFLLIDMQNR--RR---                                   |
| MmGdf15    |     | -----                                                        |
| MmGdnf     |     | -----                                                        |
| MmAmh      |     | -----                                                        |

**Fig. S5. Expanded TGF-β subfamily prodomain alignment indicating structural conservation.** Sequences from Fig. 4 including underlining and presented as in Fig. S4.



|                |     | --α1-----                                                   | --LatencyLasso- | -----α2-----                      |
|----------------|-----|-------------------------------------------------------------|-----------------|-----------------------------------|
| DmMaverick     | 245 | SKRVDETR-LKHLVLKGLGKIKKL-FDVRKVNISQA                        | ----            | EYSSKYIEYLSRLRS-----              |
| DmMyoglianin   | 202 | AKVDSIES-ISKMHILMRNLKKL-PNITKPI                             | -----           | SVPMNIIDNFYRDYNASS-KT             |
| MmGdf11        | 69  | SRELRLS-ISKQILSKRLKEA-PNLSREVVKQLLPKAPPLQQILDHDFQGDALQ-P-   |                 |                                   |
| MmMstn         | 49  | TRYSRLEA-ISKQILSKRLLETA-PNLSKDAIRQLLPAPPLRELIDQYDVQRDDSS-S- |                 |                                   |
| CeTIG-3        | 1   | MSTSR-----                                                  |                 |                                   |
| MmTgfb1        | 41  | VKRKRLEA-IRGQILSKRLASP-PSQGEVPPG                            | -----           | PLPEAVLALYNSTRDRVA-G-             |
| MmTgfb2        | 32  | FMRKRLEA-IRGQILSKRLTSP-PEDY-PEPD                            | -----           | EVPPEVISIYNSTRDLLQ-E-             |
| MmTgfb3        | 35  | IKKKRVEA-IRGQILSKRLTSP-PEPS-V-MT                            | -----           | HVPYQVLALYNSTRELLE-E-             |
| CeUNC-129      | 25  | -----L-INETIRDLLEHFKSSDPN                                   | -----           | TSFHRS-----                       |
| CeDAF-7        | 34  | MKQHRTE-YLKNEILDQENMKEA-PKGLKPMDEPMKSVYLE-M-YRDLLEK-D       | -----           | EQ                                |
| MmBmp3         | 56  | VSEHMTWLYDRYSGSSRQATRT-PGSQLPGPQPL                          | -----           |                                   |
| MmGdf10        | 71  | VAIHMERLYEKYNRRG-----                                       |                 | APP-----                          |
| MmInhba        | 50  | SQPEMVEA-VKKHILNMLHKKR-PDVTQVPVKAALLNAIRKL                  | -----           | H-----VG                          |
| MmInhbb        | 74  | VDGDFLEA-VKRHILSRQLRGR-PNTHAVPKAAMVTALRKL                   | -----           | H-----AG                          |
| MmInhbc        | 39  | QRELLDL-AKKSILDKHLSQR-PILSRPVSRGALKTALQRL                   | -----           | R-----GP                          |
| MmInhbe        | 39  | ERALVLEL-AKQQLLEGLHLTSR-PRITRPLPQAALTRALRL                  | -----           | Q-----PK                          |
| DmActivin-beta | 546 | MNE-----                                                    |                 | NALKKSTYPIDINHSDNKTHTG            |
| MmLefty1       | 27  | -----ILGSELQQQLDQF-PVLDKADVEGMVIPSHVRTQYVALLQSHAS           | -----           | R                                 |
| MmLefty2       | 27  | -----VLSSILQQQLSQA-PTLDSADVEEMAIPTHVRSQYVALLQGSHAD          | -----           | R                                 |
| MmInha         | 213 |                                                             |                 |                                   |
| DmDawdle       | 247 | LTHLRTEF-VKQQLLEKRLKES-PKNSA                                | ----            | VELPKPIFDGM----T                  |
| MmGdf15        | 132 | ARPWDITR-PL-KRALSRGPRAPALRLRL                               | ----            | TPPPDLA-----MLPS-----             |
| MmGdnf         |     |                                                             |                 |                                   |
| MmAmh          | 365 | SAPWAAGL-QR-RVAVEIQAAAS-ELRDLPLGLPPTAPPLLRL                 | ----            | LALCPNDS----R                     |
|                |     | end straitjacket -β1-- TGF-β                                |                 |                                   |
| DmMaverick     | 293 | -----NQEKGSYFNFMGASFTRDHLFLSITTNFNDISNKRRLHRRSLKKIN         |                 |                                   |
| DmMyoglianin   | 251 | TVVNRMESIDESHLISINDTYGDHIMTDFDESSSSQMGGDANTVNEFLIDLNKNQAKKS |                 |                                   |
| MmGdf11        | 125 | EDF-----LEEDEYHAT-----                                      |                 | TETVISMAQETDPAV                   |
| MmMstn         | 104 | DGS-----LEDDDYHAT-----                                      |                 | TETIITMPTESDFLM                   |
| CeTIG-3        | 6   | -----KHDLYGG-----                                           |                 | VLDKITLEPNRK--                    |
| MmTgfb1        | 91  | ESAD-----PEPEPEADYYAK-----                                  |                 | EVTRVLMVDRNNAIY                   |
| MmTgfb2        | 81  | KASRRAAA-CERERSDEEYYAK-----                                 |                 | EVYKIDMPSHLPSET                   |
| MmTgfb3        | 83  | MHGEREEG-CTQETSESEYYAK-----                                 |                 | EIHKFDMIQGLAEHN                   |
| CeUNC-129      | 50  | --SHT-----                                                  |                 |                                   |
| CeDAF-7        | 84  | DMGVE-----MSFYTA-----                                       |                 | KDPSYGEN-----                     |
| MmBmp3         | 90  | RGG-----                                                    |                 | NTVRSFRAAAA-----                  |
| MmGdf10        | 90  | GGG-----                                                    |                 | NTVRSFRARLE-----                  |
| MmInhba        | 94  | KVG-----                                                    |                 | EN-----G-----Y                    |
| MmInhbb        | 118 | KVR-----                                                    |                 | ED-----G-----R                    |
| MmInhbc        | 83  | RRE-----                                                    |                 | T-----                            |
| MmInhbe        | 83  | SMV-----                                                    |                 |                                   |
| DmActivin-beta | 572 | KNG-E-----MSHNDYEFNDYSVQ-----                               |                 | THDKNRYHEGRSSIGYQPAIHN            |
| MmLefty1       | 73  | SRGKR-----FSQNLREVAGRFLVS-----                              |                 | ET-----S----                      |
| MmLefty2       | 73  | SRGKR-----FSQNFREVAGRFLMS-----                              |                 | ET-----S----                      |
| MmInha         | 213 |                                                             |                 |                                   |
| DmDawdle       | 294 | KNK-E-----LDDYYARTSKKFILL-----                              |                 | NR--EEVECNARDGKSNP--              |
| MmGdf15        | 171 | -GGTQ-----LELR-----                                         |                 | LRVAAGRGR--                       |
| MmGdnf         |     |                                                             |                 |                                   |
| MmAmh          | 414 | SSGDP-----LRALLL---LKALQG-----                              |                 | LRAEWHGREGRGRTGR-----             |
|                |     | end straitjacket -β1-- Activin                              |                 |                                   |
| DmMaverick     | 342 | RLNQNPKKHQNYGD-----                                         |                 | LLRGEQD---TMNILLHPLTN-----AQ      |
| DmMyoglianin   | 311 | DIPINTNDE-EYES-----                                         |                 | ILSHISS-----IY---IPPEIQPHVRHNRKVD |
| MmGdf11        | 152 | Q-----TD-----                                               |                 | GS---PLC-----                     |
| MmMstn         | 131 | Q-----AD-----                                               |                 | GK---PKC-----                     |
| CeTIG-3        | 25  | -SWTCLTPE-----                                              |                 |                                   |
| MmTgfb1        | 122 | EK-----TK-----                                              |                 | DI-SH---SIY--                     |
| MmTgfb2        | 117 | VCPVVTPSGSLGS-----                                          |                 | FCSRQSQ---VLC---GLDAI-PPTFYRPYFR  |
| MmTgfb3        | 119 | ELAVC---PK-----                                             |                 |                                   |
| CeC53D6.2      | 53  | -LTE--HMKNLYENFIDEDSNEDGNLVRAIEPAVGKFEGQEVLV                |                 | FDVEG-FDSHESIMRA                  |
| CeDAF-7        | 103 |                                                             |                 | PSQLVAKSDVTN-DLERSDILQA           |
| MmBmp3         | 104 | -GTP--QTKG-----                                             |                 | LHTENLTS-LTKSENILSA               |
| MmGdf10        | 104 | -MI---DQKP-----                                             |                 | VYFENLTS-MQDSEMILTA               |
| MmInhba        | 101 | VEIE--DDIGRRA-----                                          |                 | EMNELMEQTSEIITAEAG--T--ARK        |
| MmInhbb        | 125 | VEIP--HLDGHAS-----                                          |                 | PGADGQERVSEIISAEETD-GLAS--SRV     |
| MmInhbc        | 87  | -LLE--H-----                                                |                 | DQRQEEYEIISADTD-LSSI--NQT         |
| MmInhbe        | 86  | --P-----                                                    |                 | GN--REKVISATII-DKST-STYRS         |
| DmActivin-beta | 613 | IEYE--NQKGHHESFADDHEN-----                                  |                 | IDHEDFFGNTQEIITAEAG-TQYR--QYR     |
| MmLefty1       | 96  |                                                             |                 | TH-----                           |
| MmLefty2       | 96  |                                                             |                 | TH-----                           |
| DmDawdle       | 330 |                                                             |                 | SM-----                           |
| MmGdf15        |     |                                                             |                 |                                   |
| MmGdnf         |     |                                                             |                 |                                   |
| MmAmh          |     |                                                             |                 |                                   |

Fig. S6. Page1

</

|                |     | bowtie-- $\beta$ 9--                                    | no- $\beta$ 9'-                           | -- $\beta$ 10--           | -- $\alpha$ 5-- |
|----------------|-----|---------------------------------------------------------|-------------------------------------------|---------------------------|-----------------|
| DmMaverick     | 520 | DFSPSTPPR-----                                          | STASSDEHLNMPVNIIGHGTLN---                 |                           |                 |
| DmMyoglianin   | 463 | -----SLVVTTD-----                                       | NTSKNELTHIEIG-----                        |                           |                 |
| MmGdf11        | 269 | -----VTSLGP-----                                        | GAEGLHPFMEIRVLE-----                      |                           |                 |
| MmMstn         | 240 | -----VTFPGP-----                                        | GEDGLNPFLERKVTD-----                      |                           |                 |
| CeTIG-3        | 135 | -----                                                   | -----                                     |                           |                 |
| MmTgfb1        | 232 | ----- <u>LHVEING</u> -----                              | ISPKRRG-DLGTIH-----                       | DMNRPFLLMATPLERAQ---      |                 |
| MmTgfb2        | 269 | NKSEELEARFAGID--                                        | GTSTYASG-DQKTIKSTRKKTSGKTEHLLMLLPSYRLE--- |                           |                 |
| MmTgfb3        | 241 | NVHEVMEIKFKGVD--                                        | NEDDHGRG-DLGRLK---                        | KQKDHNNPHLIIMMIPPHRLD---  |                 |
| CeUNC-129      | 191 | -----                                                   | RPYA-----                                 | EMIRKSTPFLVYISKVNHTLDTVSV |                 |
| CeDAF-7        | 216 | -----                                                   | -----                                     | VDNRLQLSTRPK---           |                 |
| MmBmp3         | 229 | -----LFFPEPYI---                                        | LVYANDAAISEPESVSSLQRHDETAGTG-----         | PR----                    |                 |
| MmGdf10        | 233 | -----PSSHMPYI---                                        | LVYANDLAISEPNSVAVSLQRYDPFPAGDFEPGAAPN---  |                           |                 |
| MmInhba        | 254 | -----LVLLGKKKKKEVDGDGKKKDGSDGGLLEEKEQSHRPFLMIQARQS----- |                                           |                           |                 |
| MmInhbb        | 266 | -----PVFVD-----                                         | PGEESHRRPFVVVQARLG-----                   |                           |                 |
| MmInhbc        | 207 | -----                                                   | HSSL-ILGWFSHRPFVAAQVRVE-----              |                           |                 |
| MmInhbe        | 204 | -----                                                   | LPRLLLDTAGQRPFLERKIRAN-----               |                           |                 |
| DmActivin-beta | 794 | -----HLFQTSKLRGN-----                                   | SSDYLSTNPNRPFVLHTESS-----                 |                           |                 |
| MmLefty1       | 195 | -----                                                   | -----                                     | QPLLI-QVSVQ-----          |                 |
| MmLefty2       | 195 | -----                                                   | -----                                     | QPLLI-QVSVQ-----          |                 |
| MmInha         | 213 | -----                                                   | -----                                     | TPFLVAHTRAR-----          |                 |
| DmDawdle       | 445 | -----EIIS-----                                          | VDKDYRPFIVDMQNR-----                      |                           |                 |
| MmGdf15        |     | -----                                                   | -----                                     |                           |                 |
| MmGdnf         |     | -----                                                   | -----                                     |                           |                 |
| MmAmh          |     | -----                                                   | -----                                     |                           |                 |

**Fig. S6. Expanded Activin+TGF- $\beta$  subfamily prodomain alignment indicating structural conservation.** Sequences from Fig. 6 including underlining and presented as in Fig. S4.

|         |     |                                   | -----α1-----                                 | -LatencyLasso-----                            |        |
|---------|-----|-----------------------------------|----------------------------------------------|-----------------------------------------------|--------|
| DmSCW   | 30  | -----                             | IYQKRPLSEQME                                 | ITIDILDLGDRPRRQAEP                            | -----  |
| DmGBB   | 56  | -----                             | LSEDDKLDVSYETIE                              | FLGLTAERTHLSSHQL                              | -----  |
| MmBmp8a | 35  | -----                             | LGARERRDMQREITL                              | AVLGLPGRPRRAQAAA                              | -----  |
| MmBmp8b | 35  | -----                             | LGVREPRDMQREIRE                              | VLGLPGRPRRAPVGAA                              | -----  |
| MmBmp6  | 68  | -----                             | LKTHEKREMQKETIS                              | VLGLPHRPRPLHGLQQPQPPVLPFQQQQQQQQQQ            | -----  |
| MmBmp5  | 43  | -----                             | LRNHERREIQREIT                               | LSILGLPHRPRPFSPG                              | -----  |
| MmBmp7  | 46  | -----                             | LRSQERREMQREIT                               | LSILGLPHRPRHLQG                               | -----  |
| CeDBL-1 | 42  | -----                             | ADQHASHATRRGLR                               | KLKGLHVE--V--QT                               | -----  |
| MmBmp10 | 50  | -----                             | DFNTLLQSMKNEFT                               | KTTLNLSDF--V--QD                              | -----  |
| MmGdf2  | 53  | -----                             | DLQMFLNMKVDFIR                               | SLNLSGIE--S--QD                               | -----  |
| CeTIG-2 | 38  | -----                             | G--QATDK--IGE                                | QIRELFNIDINE--NGPAV                           | -----  |
| MmGdnf  | 61  | -----                             | PAED-----                                    | HSGLHRRVP--F--AL                              | -----  |
| DmDPP   | 213 | -KD--KLK--PDPSTLVEIEKS            | LSLNFNKRFP--K--ID                            | -----                                         | -----  |
| MmBmp2  | 41  | -----                             | LSR--PSEDVLSEFELRL                           | SMFGLKQRP--T--PS                              | -----  |
| MmBmp4  | 43  | GGR--RSG--QSHELLRDFEAT            | LLQMFGLRRR--Q--PS                            | -----                                         | -----  |
| MmBmp15 | 35  | ---                               | LADDP                                        | TLPSILDLAKEA---PG-----KEMKQ                   | -----  |
| MmGdf9  | 55  | ---                               | GTD                                          | RSGLPPLFKVLSDR---RG-----ETPKL                 | -----  |
| MmGdf1  | 25  | PAPASMG---                        | PAAALLQV-----                                | LGLPEAFRSVPTHR                                | -----  |
| MmGDF3  | 20  | -GQTSEF---                        | QSDLLQF-----                                 | LGLEKAPSP-HRFQ                                | -----  |
| MmNodal | 13  | -----                             | ACWALLHPR---                                 | APTAAALPL--WTRGQ                              | -----  |
| MmGdf5  | 124 | GKGASSKAGSAPSSFLKKTR              | ---                                          | EP-GTPRE--KEPFR                               | -----  |
| MmGdf6  | 81  | G-----                            | QH-QGQEPF--G--R                              | -----                                         | -----  |
| MmGdf7  | 65  | G-----                            | PR-AVRRAA--GSGFR                             | -----                                         | -----  |
|         |     |                                   | -----α2-----                                 |                                               |        |
| DmSCW   | 59  | -----                             | NLHNSASKF                                    | ILEVYNETSEDQEPKEVLHQR                         | -----  |
| DmGBB   | 87  | -----                             | SLRKSAPKF                                    | ILDVYHRTIAEEGLSDQDEDDDYERGHRS                 | -----  |
| MmBmp8a | 67  | -----                             | RQPASAP                                      | LEMLDLYHAMTDDDDGGFP                           | -----  |
| MmBmp8b | 67  | -----                             | QQPASAP                                      | LEMLDLYHAMTDDSGGTP                            | -----  |
| MmBmp6  | 117 | TAREEPPPGRLKSAP                   | LEMLDLYNALNSDDEEDGASEGVGQEPGSHGGASSQLRQPSPGA |                                               |        |
| MmBmp5  | 72  | -----                             | KQASSAP                                      | LEMLDLYNAMASEDNPEESEYLVRVSLAGEAKETRKGYPASPNGY | -----  |
| MmBmp7  | 75  | -----                             | KH-NSAP                                      | MEMLDLYNAMAVEESGPDG                           | -----  |
| CeDBL-1 | 68  | -----                             | GPSIDVPEQH                                   | MDIYDDNDVD                                    | -----  |
| MmBmp10 | 76  | -----                             | TGRVDPPEY                                    | MLELYNKFATDRT                                 | -----  |
| MmGdf2  | 79  | -----                             | KTRAEP                                       | PEYMLDLYNRYTTDKS                              | -----  |
| CeTIG-2 | 64  | -----                             | KANNYVSTYMKRLY                               | KOLENYEHGENHNEE-EVN                           | -----  |
| MmGdnf  | 77  | -----                             | TSDSNMEEDY                                   | PEQEDDVMDFIQATIKRLKRSPDK                      | -----Q |
| DmDPP   | 244 | -----                             | RSKIIIEPEPMKKLYAE                            | IMGHELD--SVNI                                 | -----  |
| MmBmp2  | 70  | -----                             | KD-VVVP                                      | PEYMLDLYRRHSQGPGA--PAPD                       | -----  |
| MmBmp4  | 75  | -----                             | KS-AVIE                                      | PYMRDLYRLQSGEEEE--EEQS                        | -----Q |
| MmBmp15 | 59  | -----                             | WPQGYPLRYMLKLY                               | HSAD-PHGHPRE                                  | -----  |
| MmGdf9  | 80  | -----                             | QPSDRALYIMKKLY                               | KTYAT-KEGVKPK                                 | -----  |
| MmGdf1  | 54  | -----                             | PVPP--VMWRL                                  | ERRRDQEARVGRPL                                | -----  |
| MmGDF3  | 47  | -----                             | PVPR--VLRKI                                  | IRAREA-AAASGASQ                               | -----  |
| MmNodal | 36  | -----                             | PSSPSPLAYMLSLY                               | RDPLP-RA                                      | -----  |
| MmGdf5  | 158 | -----                             | PPPITPHEYMLSLY                               | RTISD-ADRKGGNS                                | -----  |
| MmGdf6  | 92  | -----                             | GLRVVPHEYMLSTY                               | KTYYSI-AEKLGINA                               | -----  |
| MmGdf7  | 79  | -----                             | NGSVVPHHEMMSLY                               | RSLAG-RAPVAAA                                 | -----  |
|         |     |                                   | end straitjacket--β1---                      | -β1'--                                        |        |
| DmSCW   | 89  | ---H---                           | KRSLDDILISNEDRQEIASCNS                       | ILTFSSRLKPE---QL---DNELD                      |        |
| DmGBB   | 125 | ---                               | RRSADLEEDEGEQQKNFITDLDKRAIDES                | DTIMIFLNKRHHNVDEL---RHEHG                     |        |
| MmBmp8a | 93  | -----                             | QAHLGRAD                                     | LVMSFVNIVERDRTLG---QEPHW                      |        |
| MmBmp8b | 93  | -----                             | QPHLDRA                                      | LVMSFVNIVERDRTLG---QEPHW                      |        |
| MmBmp6  | 177 | AHSLNRKSLAPGPGGGASPLTSAQDSAFLNAD  | VMSEFVNIVEYDKEFSP---HQRHH                    |                                               |        |
| MmBmp5  | 124 | AHRLHLP--PRTPLTTQSPPLASLHDTNFLNAD | VMSEFVNIVERDKEFSP---QRRHY                    |                                               |        |
| MmBmp7  | 100 | -QGFSYP--YKAVFSTQGPPLASLQDSHFLTD  | ADVMSEFVNIVEHDKFFH---PRYHH                   |                                               |        |
| CeDBL-1 | 89  | -----                             | WVRHMYPKEI                                   | IDNEG--F-----                                 |        |
| MmBmp10 | 98  | -----                             | SMPSAN                                       | LIRSFKNEDLFSQPVT---F-NGLRK                    |        |
| MmGdf2  | 101 | -----                             | STPASN                                       | LVRSFVEDAISTAAT---EDFPFQK                     |        |
| CeTIG-2 | 96  | -----                             | AWLSAD                                       | RLVSHMAQEV---H--R-LDDGS                       |        |
| MmGdnf  | 112 | AAALPRR-----                      | ER-----                                      |                                               |        |
| DmDPP   | 271 | ---PKP---                         | GLLTKSANT                                    | VRSFTHKDSKID-DR---F-PHHHR                     |        |
| MmBmp2  | 96  | ---HRL---                         | ERASRANT                                     | VRSFHHEEAVEELPE---M-SGKTA                     |        |
| MmBmp4  | 102 | GTGLEYP-----                      | ERPASRANT                                    | VRSFHHEEHLNIPG--T-SESSA                       |        |
| MmBmp15 | 85  | -----                             | NRTIGAK                                      | MVLVKPSANTVVRPPR-GSW---HV                     |        |
| MmGdf9  | 106 | -----                             | SRSHLYNT                                     | VRLFSPCAQQEQAPS-NQVTGPLPM                     |        |
| MmGdf1  | 78  | --RPCHV-----                      | EELGVA                                       | ENVIRHIPDGLSSRPAQPARTSGLCPE                   |        |
| MmGDF3  | 70  | --DLCYV-----                      | KELGVR                                       | NLQLLPDQGFFLNTQKPF-QDGSCLQ                    |        |
| MmNodal | 57  | -----                             | DIIRSLQAQDVD                                 | -----VTGQN                                    |        |
| MmGdf5  | 185 | ---SV---                          | KLEAGLANT                                    | ITSFIDKQDVRG---PAVRK                          |        |
| MmGdf6  | 119 | ---SF---                          | FQSSKSANT                                    | ITSFVDRGLDLSH---TPLRR                         |        |
| MmGdf7  | 105 | -----                             | SGHGRVDT                                     | ITGFTDQATQETA---AAEPG                         |        |

Fig. S7 Page 1





|         |     | $\beta$ 10-   | no- $\alpha$ 5-                  |                                  |
|---------|-----|---------------|----------------------------------|----------------------------------|
| DmSCW   | 251 | IVGYFNGPELLV  | KIQKLRFKR                        | -----                            |
| DmGBB   | 302 | MTGFERGPELIK  | ATAHSSHRSKR                      | -----                            |
| MmBmp8a | 245 | MVTFFRASQSPV  | RAPR                             | -----                            |
| MmBmp8b | 245 | MVGFFRANQSPV  | RAPRTAR                          | -----                            |
| MmBmp6  | 356 | MVAFKVKSEVHV  | RTTR                             | -----                            |
| MmBmp5  | 301 | MVAFKASEVLLR  | SVR                              | -----                            |
| MmBmp7  | 276 | MVAFKATEVHLR  | SIR                              | -----                            |
| CeDBL-1 | 219 | PLIVFSDLSEPSS | VRRK-R                           | -----                            |
| MmBmp10 | 252 | LLVVFSDDQSN   | DK--EQ-KEELNELITHEQDL            | LDSDA---FF-SGPD--EEALLQMR        |
| MmGdf2  | 252 | FFVVFSDNDRS   | NGTK-ET-RLELKEMIGHEQETMLV        | KTNAYQVAGESQEEEGLDGY---          |
| CeTIG-2 | 214 | LVIALKDE      | DAGPPKKRSRRSASTTPI               | SAPPMRQKVKRSESAYFEK-PNENERCQ---- |
| MmGdnf  |     |               |                                  | -----                            |
| DmDPP   | 440 | LLFTVTDDGRH   | KA--RSIRDVSGGEGGGKGG             | -----RNKR-----                   |
| MmBmp2  | 261 | LLVTFGH       | DGKGHP--LHKREKR                  | -----                            |
| MmBmp4  | 272 | LLVTFGH       | DGRGHT--LTRRRAKR                 | -----                            |
| MmBmp15 | 231 | LLLYENDTDDR   | VQGK-----L-----                  | -----LARGQEELTDR                 |
| MmGdf9  | 253 | LLLYLNDTSTQ   | AYHS-----W-----                  | -----QSLQSTW---RPLQHPGQAGVAAR    |
| MmGdf1  | 220 | LLVTLDPRL     | CP-----                          | -----                            |
| MmGDF3  | 234 | LLVVTLNPKH    | CH-----                          | -----                            |
| MmNodal | 198 | LMLYSNRPQEQ   | RQL-----GGATLLWEAESSW            | ---RAQE--GQL----                 |
| MmGdf5  | 335 | LLVFGRTKKR    | DLFFNE-----IKARSGQDDKT           | VYEY-----                        |
| MmGdf6  | 280 | LLVVFTR       | SQRKN-LFTE-----MHEQLGSAEAAGAEGSW | ---PAPS--GSP----                 |
| MmGdf7  | 263 | LLVISSRTQR    | KESLFRE-----IRAQARALRAA          | ---AE-----PPPD--PGP----          |

**Fig. S7. Expanded BMP subfamily prodomain alignment indicating structural conservation.**

Sequences from Fig. 8 including underlining presented as in Fig. S4.

|                |     | Association | -----a1----- | -----LatencyLasso----- |                                                           |
|----------------|-----|-------------|--------------|------------------------|-----------------------------------------------------------|
| MmBmp15        | 35  |             |              |                        | LADDP                                                     |
| MmGdf9         | 55  |             |              |                        | GDRSG                                                     |
| MmNodal        | 1   |             |              |                        | SAHSRLILQ                                                 |
| MmGdf5         | 92  |             |              |                        | PPRSGGPETKPGPSSQTR--QAAAR--TTFKGLGGKASSKAG                |
| MmGdf7         | 50  |             |              |                        | ARAPGP--SALQA--AAVPG                                      |
| MmGdf6         | 53  |             |              |                        | QRTPQESAEGR--TPEHGLRQKDRRRPFG                             |
| DmActivin-beta | 314 |             |              |                        | SHKGCTLCHESGKPNYTKDNPHDYASDEVRLSHKROLTKGGLSH-KEN--VSHPL   |
| CeTIG-3        | 1   |             |              |                        | MS                                                        |
| DmSCW          | 17  |             |              |                        | TTYVTT--N--NHIE--M--PIYQKRPLSEQMEYDIDIDLDG-RFR--RQAEF     |
| DmGBB          | 40  |             |              |                        | GIYIDN--GKDQTIMH--R--VLSEDDKLDVSYELFEFGHAE-RPT--HLSSH     |
| MmBmp8a        | 19  |             |              |                        | GGGHGP--RPPHTCPQ--R--RLGARERRDYQREHLAVGCLPG-RFR--PRAQP    |
| MmBmp8b        | 19  |             |              |                        | GGGHLN--HPPHVFPQ--R--RLGVREPRDYQREHREVGLPG-RFR--SRAPV     |
| MmBmp6         | 52  |             |              |                        | EQPPFQ--SSSSGFLY--R--RLKTHEKREYQREHLSVGLPH-RFR--PLHGL     |
| MmBmp7         | 30  |             |              |                        | DFSLDN--EVHSSFIH--R--RLRSQERREYQREHLSIGLPH-RFR--PHLQG     |
| MmBmp5         | 27  |             |              |                        | GGLDN--HVHSSFIY--R--RLRNHERREYQREHLSIGLPH-RFR--PFSFG      |
| MmBmp3         | 4   |             |              |                        | ARGLLCLWLGYFCLNLAQGR-PNHLPLGLRETEES--DRATG                |
| MmGdf10        | 17  |             |              |                        | MVPLLLLLRGAGCGHRGPSWSSLPSSAAGLQGRDS--QQSPG                |
| DmMyoglianin   | 175 |             |              |                        | SRVQSVSLYRNTLINIESMLQRLREKAKVDSIESHKMHLMRNLKKL-PN--ITKP-  |
| MmMstn         | 35  |             |              |                        | KEGLCNACAWRQ--NTRYRIEAKIKQLSKRLKETA-PN--ISKD-             |
| MmGdf11        | 56  |             |              |                        | EPDGPFCVVRQ--HSRELRLSHKQQLSKRLKEA-PN--ISRE-               |
| MmTgfb1        | 29  |             |              |                        | GLSTCKTID--MELVKRRRIEARGQLSKRLKASP-PS--QG-E-              |
| MmTgfb2        | 20  |             |              |                        | SLSTCSTLD--MDQFMKRRIEARGQLSKRLKASP-PS--DY--               |
| MmTgfb3        | 23  |             |              |                        | SLSTCTTLD--FGHIKKRVEARGQLSKRLKASP-PS--PS--                |
| MmInha         | 21  |             |              |                        | CGG--PELV-R--ELVLAKVKAFLDALGPPAM-DG--EGGD-                |
| MmGdf15        | 33  |             |              |                        | SQG--DALA-MP--EQRPSGPESQNA--DE--LR--                      |
| MmGdf1         | 22  |             |              |                        | TLA--PAP--ASMGPAAALQVGLPEA-RF--SV--                       |
| MmGDF3         | 20  |             |              |                        | GQ--TSEFQDSDLQFGLPEA-PS--P--                              |
| CeUNC-129      | 2   |             |              |                        | RRLPVILLV--F--SIANCAKVDVLDINETHRLDHFHSSDPN--VTSF-         |
| CeDAF-7        | 30  |             |              |                        | CIEKMKQHR--TEYIKNEHLDQNMKE-APK--GLKP-                     |
| DmMaverick     | 249 |             |              |                        | DETRIKHLVLKGGGKK-LPD--MRKV-                               |
| MmInhba        | 44  |             |              |                        | PDCPSCALATL--PKDGPNSQPEMVEAKKHHLNMHKK-RED--VTQP-          |
| MmInhbb        | 68  |             |              |                        | DTCTSCGGGG--PEELGRVDGDFLEAKKHHLNRQLRG-RFN--ITHA-          |
| MmInhbc        | 39  |             |              |                        | GPCPCWGAIF--QRELLDLAKSHLDKHLKQ-RFI--LSRP-                 |
| MmInhbe        | 39  |             |              |                        | SACPCGGPTL--ERALVLELAKQQLLEGHLS-RFR--ITRP-                |
| CeDBL-1        | 24  |             |              |                        | SAILHLFLIS--FTPMSAAADQHASHATRRGLRKGLDEH-VFV--Q-           |
| MmGdf2         | 56  |             |              |                        | M--FLENKVDPLRSNLSG-IPS--Q-                                |
| MmBmp10        | 53  |             |              |                        | T--LLQSKNEFKTNLSD-IFV--Q-                                 |
| CeTIG-2        | 42  |             |              |                        | DKGGEQRELFNHI-NEN--GP-                                    |
| DmDawdle       | 226 |             |              |                        | SAGGCPKCESNRQ-VEHITE--EQLTH-LRIEFYKQHLKELKE-SPK--         |
| MmLefty1       | 27  |             |              |                        | IL--GSELQQLDQ-PEV--LDKA-                                  |
| MmLefty2       | 27  |             |              |                        | VL--SSELQQLDQ-ATF--LDSA-                                  |
| MmAmh          | 191 |             |              |                        | RYLV--L--TVDFP--AGAWSGSGIL-TLQ--P-                        |
| MmGdnf         | 65  |             |              |                        | HSLSHRR-VFV--A-                                           |
| DmDPP          | 223 |             |              |                        | LVEIE-KSLSLFNKKR-PEK--I-                                  |
| MmBmp2         | 49  |             |              |                        | LSEFE-LRLSLMFGLKQ-RPT--P-                                 |
| MmBmp4         | 54  |             |              |                        | LRDFE-ATLQMFGLRR-REQ--P-                                  |
|                |     |             |              |                        |                                                           |
| MmBmp15        | 53  |             |              |                        | GKEMKQWPQGYPLRYLKLHRSADPHGHPRE-                           |
| MmGdf9         | 74  |             |              |                        | GETPKLQPDSTRALYYKKYKTYATKEGVKPK-                          |
| MmNodal        | 30  |             |              |                        | LWTRGPSSPSPLAYLSLYRDPLPRA--                               |
| MmGdf5         | 152 |             |              |                        | PKEPFRPPPIITPHEYLSTYRTLSADRRKGNS                          |
| MmGdf7         | 73  |             |              |                        | AGSGFRNGSVVPHFMSLYRSLAGRAPVAAA-                           |
| MmGdf6         | 89  |             |              |                        | PG--RGLRVVPEHYLSYKTYISIAEKLGINA                           |
| DmActivin-beta | 515 |             |              |                        | MPIELKSHHNSSPKELKSGAVRKVNGINGTQMNEALNKKSTYPMHNHSDNKTHTGNG |
| CeTIG-3        | 3   |             |              |                        | TSRKHDVGGVL--                                             |
| DmSCW          | 65  |             |              |                        | SKFLVYNEISEDQEPKEV--                                      |
| DmGBB          | 93  |             |              |                        | PKFLDVVHRITAEGLSDQ--                                      |
| MmBmp8a        | 73  |             |              |                        | PLFVLDYHAMTDDDDGGPP--                                     |
| MmBmp8b        | 73  |             |              |                        | PLFVLDYRAMTDDSGGGTP--                                     |
| MmBmp6         | 131 |             |              |                        | PLFVLDYNALSDDEEDGA--                                      |
| MmBmp7         | 80  |             |              |                        | PMFLDYNAMAVEESGPDG--                                      |
| MmBmp5         | 78  |             |              |                        | PLFVLDYNAMASEDNPEES--                                     |
| MmBmp3         | 56  |             |              |                        | VSEHYLDYD-RYSGSSRVQAT--                                   |
| MmGdf10        | 71  |             |              |                        | VAIHRLRYE-KYNRRG--                                        |
| DmMyoglianin   | 235 |             |              |                        | NIDNRYRDYNASSKTTVM--                                      |
| MmMstn         | 87  |             |              |                        | PLREHDDQVQRDSS-S-DGS                                      |
| MmGdf11        | 107 |             |              |                        | PLQQLDHDHFGDALQP-EDF--                                    |
| MmTgfb1        | 76  |             |              |                        | AVLAINSTRDRVAG-ESA--                                      |
| MmTgfb2        | 66  |             |              |                        | EVSTYNSTRDLLQE-KAS--                                      |
| MmTgfb3        | 68  |             |              |                        | QVLAUNSTRELLEE-MHG--                                      |
| MmInha         | 63  |             |              |                        | RHAGGFMHRTSEPEEE-DVS--                                    |
| MmGdf15        | 65  |             |              |                        | SRLHANQSRDSS-NSE--                                        |
| MmGdf1         | 58  |             |              |                        | VWRFLRRRDPQEA-RVG--                                       |
| MmGDF3         | 51  |             |              |                        | LRKIIRAREA-AA-ASG--                                       |
| CeUNC-129      | 53  |             |              |                        | LTEHKNYENFIDEESN-EDG--                                    |
| CeDAF-7        | 66  |             |              |                        | MKSVYELRDLEKDEQ-DMG--                                     |
| DmMaverick     | 279 |             |              |                        | YSSKYHEYLSRLSNQEK-GNS--                                   |
| MmInhba        | 79  |             |              |                        | PKAATNAIRKLHVGVG-ENG--                                    |
| MmInhbb        | 103 |             |              |                        | PKAATNALRKLHAGKVR-EDG--                                   |
| MmInhbc        | 68  |             |              |                        | SRGAKTALQRLRGPRRE-T--                                     |
| MmInhbe        | 68  |             |              |                        | PQAAATRALRRLQPKSMV--                                      |
| CeDBL-1        | 73  |             |              |                        | VPQHWDIQDDNDVDW--                                         |
| MmGdf2         | 84  |             |              |                        | PQYVLDLNNRYTTDK--                                         |
| MmBmp10        | 81  |             |              |                        | PPEYVLDLNNKFATDR--                                        |
| CeTIG-2        | 65  |             |              |                        | ANN--                                                     |
| DmDawdle       | 276 |             |              |                        | LKPFDFGMTLSHPDST-KNK--                                    |
| MmLefty1       | 53  |             |              |                        | IPSHORTQVALLQSHA--                                        |
| MmLefty2       | 53  |             |              |                        | IPTHRSQVALLQSHA--                                         |
| MmAmh          | 222 |             |              |                        | LSIDQ--AFLFGSDSR--                                        |
| MmGdnf         | 82  |             |              |                        | MPEDYPDQDDVMDFIQA--                                       |
| DmDPP          | 249 |             |              |                        | IPFPKKHAEIMGHELD--                                        |
| MmBmp2         | 74  |             |              |                        | VPPYVLDLRRHSGQPGA--                                       |
| MmBmp4         | 79  |             |              |                        | TPDYRDLRLQSGEEEE--                                        |

Fig. S8 Page 1



|                |     |                                                 |                                                 |       |
|----------------|-----|-------------------------------------------------|-------------------------------------------------|-------|
|                |     |                                                 | end straitjacket TGFβ--β1---                    |       |
| MmBmp15        | 85  | -----                                           | -----                                           | ----- |
| MmGdf9         | 106 | -----                                           | -----                                           | ----- |
| MmNodal        | 57  | -----                                           | -----                                           | ----- |
| MmGdf5         | 185 | SVK-----                                        | -----                                           | ----- |
| MmGdf7         | 105 | -----                                           | -----                                           | ----- |
| MmGdf6         | 119 | SFF-----                                        | -----                                           | ----- |
| DmActivin-beta | 575 | EMSHN-D-----                                    | YEYFNDYSVQTHDKNR-YHEGRSSSIGYPANHNI-EYENQ-KG---- | ----- |
| CeTIG-3        | 15  | -----                                           | -----                                           | ----- |
| DmSCW          | 85  | -----                                           | LHQR-----H-----KRSL-----                        | ----- |
| DmGBB          | 113 | -----                                           | DEDDDYERGHRS-----RRSADLEEDEGE-----              | ----- |
| MmBmp8a        | 93  | -----                                           | -----                                           | ----- |
| MmBmp8b        | 93  | -----                                           | -----                                           | ----- |
| MmBmp6         | 151 | -----                                           | SEGVGQEPGSHGGASSSQLRQPSGAAHSLNRKSLLAGPGGG-----  | ----- |
| MmBmp7         | 100 | -----                                           | -----QGFSYP--YKAVFST-----                       | ----- |
| MmBmp5         | 98  | -----                                           | EYLVVRVSLAGEAKETRKGPASPNGYAHLRLHP--PRTPLTT----- | ----- |
| MmBmp3         | 77  | R-----                                          | TPGSQL-----PGP--QPLRGG-----NTVRSFRAAAAGTP--     | ----- |
| MmGdf10        | 87  | -----                                           | APPGGG-----NTVRSFRARLEMI-----                   | ----- |
| DmMyoglianin   | 254 | NRMESIDESHLSINDTYGDHIMTDFDESSSSQMQGDDA----      | NTVNEFLIDLKNQ----                               | ----- |
| MmMstn         | 107 | -----                                           | LEDDDY-----HATTETIITMPT-----                    | ----- |
| MmGdf11        | 128 | -----                                           | LEEDEY-----HATTETVISMQAQ-----                   | ----- |
| MmTgfb1        | 94  | D-----                                          | PEPEPEADY-----YAKEVTRVLMVDRN----                | ----- |
| MmTgfb2        | 84  | R-----                                          | RA-----AACERERSDEEY-----YAKEVYKIDMPSHL----      | ----- |
| MmTgfb3        | 86  | E-----                                          | RE-----EGCTQETSESEY-----YAKEIHKFDMIQGL----      | ----- |
| MmInha         | 83  | Q-----                                          | AILFPATGATCEDQP-AA-----RG--LAQE-----            | ----- |
| MmGdf15        | 81  | -----                                           | PSPDPAVRILSPEVRLGS-----HGQLLLRV-----            | ----- |
| MmGdf1         | 75  | -----                                           | RPLR-----PCHVEELGV-----AGNIVRHI-----            | ----- |
| MmGDF3         | 67  | -----                                           | ASQD-----LCYVKELGV-----RGNLLQLL-----            | ----- |
| CeUNC-129      | 74  | NL-----                                         | -----                                           | ----- |
| CeDAF-7        | 87  | VEM-----                                        | SFY-----TAKDP-----                              | ----- |
| DmMaverick     | 300 | YFN-----                                        | NFMGASFTRDH----FLSITTNGF----NDISNKRRLHRRSLKKI   | ----- |
| MmInhba        | 100 | YV-----                                         | -----EIEDDIGRRA-----                            | ----- |
| MmInhbb        | 124 | RV-----                                         | -----EIPHLDGHAS-----                            | ----- |
| MmInhbc        | 87  | -----                                           | -----LLEH-----                                  | ----- |
| MmInhbe        | 86  | -----                                           | -----P-----                                     | ----- |
| CeDBL-1        | 90  | -V-----                                         | -----RHY-----                                   | ----- |
| MmGdf2         | 100 | -----                                           | -----                                           | ----- |
| MmBmp10        | 97  | -----                                           | -----                                           | ----- |
| CeTIG-2        | 68  | YV-----                                         | -----STYMKRLYQLENY                              | ----- |
| DmDawdle       | 297 | EL-----                                         | -----DDYARTSKKFILL                              | ----- |
| MmLefty1       | 71  | -----                                           | -----SRSG-----                                  | ----- |
| MmLefty2       | 71  | -----                                           | -----DRSG-----                                  | ----- |
| MmAmh          | 238 | -----                                           | -----CFTRMTPTLVVL                               | ----- |
| MmGdnf         | 100 | -----                                           | -----TIKRLKRSPPKQ                               | ----- |
| DmDPP          | 267 | -----                                           | -----SVNI-----                                  | ----- |
| MmBmp2         | 92  | -----                                           | -----PAPD-----                                  | ----- |
| MmBmp4         | 97  | -----                                           | -----EEQSQ                                      | ----- |
|                |     |                                                 | end straitjacket Activin+BMP--β1---             |       |
| MmBmp15        | 85  | -----                                           | NRTIGAKMRLVKPSANTVRPPRG-----S--W---H            | ----- |
| MmGdf9         | 106 | -----                                           | SRSHLYNTGRLSPCAQQEQAPSN-----Q---VTGPLP          | ----- |
| MmNodal        | 57  | -----                                           | DIHRSQAQDQD-----VTGQ                            | ----- |
| MmGdf5         | 188 | -----                                           | LEAGLANHTSIDKGQDDR-----G-PAVR                   | ----- |
| MmGdf7         | 105 | -----                                           | SGHGRVDTTGTDQATQDE-----TAAAEF                   | ----- |
| MmGdf6         | 122 | -----                                           | QSSKSANTTSVDRGLDDL-----SHTPLR                   | ----- |
| DmActivin-beta | 621 | ---HHESFADDHENI--DHEDFFGNTQENITAEEGTQ-----      | YRQYR-----                                      | ----- |
| CeTIG-3        | 15  | -----                                           | D-----KI--TLEPNRKSWTCLTPESLV                    | ----- |
| DmSCW          | 94  | ---DDDILIS--N--EDRQEIASCNSLTSRRLKPE-----        | QLDNELD-----                                    | ----- |
| DmGBB          | 137 | ---QKNFIT--D--LDKRAIDESDHTLNKRHHNV--DEL-RHEHG   | -----                                           | ----- |
| MmBmp8a        | 93  | -----                                           | QHLGRADLMSVNMVERDR--TLGYQEPHW                   | ----- |
| MmBmp8b        | 93  | -----                                           | QPHLRADLMSVNIIVERDR--TLGYQEPHW                  | ----- |
| MmBmp6         | 193 | ---GASPLTS--A--QDSAFLNADMMMSVNLVEYDK--EFSPHQRHH | -----                                           | ----- |
| MmBmp7         | 113 | ---QGPLAS--L--QDSHFLTDADMMMSVNLVEHDK--EFFHPRYHH | -----                                           | ----- |
| MmBmp5         | 138 | ---QSPPLAS--L--HDTNFLNADMMMSVNLVERDK--DFSHQRRHY | -----                                           | ----- |
| MmBmp3         | 107 | Q-----                                          | T-----                                          | ----- |
| MmGdf10        | 106 | D-----                                          | Q-----                                          | ----- |
| DmMyoglianin   | 307 | AKKSDIPINTNDEEYESILS----                        | HISSEYIPPEEIOPH--V--RHNK-----                   | ----- |
| MmMstn         | 125 | ---ESDFLMQADGKP-----                            | K-----                                          | ----- |
| MmGdf11        | 146 | ---ETDPAVQTDGSP-----                            | L-----                                          | ----- |
| MmTgfb1        | 118 | NAIYEK-----T-----                               | K-----                                          | ----- |
| MmTgfb2        | 113 | PSETVCVVVTF-----                                | S-----                                          | ----- |
| MmTgfb3        | 115 | AEHNELAVC--P-----                               | K-----                                          | ----- |
| MmInha         | 107 | AEGLF-----                                      | -----                                           | ----- |
| MmGdf15        | 107 | NRASLS-----                                     | -----                                           | ----- |
| MmGdf1         | 96  | PDSGLS-----                                     | -----                                           | ----- |
| MmGDF3         | 88  | PDQGF-----                                      | -----                                           | ----- |
| CeUNC-129      | 76  | -----                                           | RAIEPAV-----GK--FE--G-----                      | ----- |
| CeDAF-7        | 98  | -----                                           | SYGE-----NPSQLAKQDVTNDLER-----                  | ----- |
| DmMaverick     | 341 | NRLNQNPKK--HQNYGDLLRGEQDTMNIHLHPLTNAQD--A-----  | -----                                           | ----- |
| MmInhba        | 112 | -----                                           | E-MNELMEQTSEHITSAES-----G--T--A-----            | ----- |
| MmInhbb        | 136 | -----                                           | P-GADGQERVSEHITSAET-----DG-LAS--S-----          | ----- |
| MmInhbc        | 91  | -----                                           | DQRQEYEHISADT-----DL-SSI--N-----                | ----- |
| MmInhbe        | 87  | -----                                           | GN--REKHSATI-----ID-KSTSTY-----                 | ----- |
| CeDBL-1        | 95  | -----                                           | -----PKEIIDNEGFLLS-----                         | ----- |
| MmGdf2         | 100 | -----                                           | SSTPAS--NIRSRSSVEDAISTAATE-DFPFQ-----           | ----- |
| MmBmp10        | 97  | -----                                           | TSMPSA--NIRSRSKNEDLFSQPVTF--NGLR-----           | ----- |
| CeTIG-2        | 84  | EHGE--N-----                                    | H--NEEVNNAW--LS-----                            | ----- |
| DmDawdle       | 313 | NREE--V-----                                    | ECNR-ARDGKS--NPSMCKTFKIDDADEG--FD-----          | ----- |
| MmLefty1       | 76  | -----                                           | -----KRSSQNLREVA-GRFLVSETS-----                 | ----- |
| MmLefty2       | 76  | -----                                           | -----KRSSQNFREVA-GRFLMSETS-----                 | ----- |
| MmAmh          | 250 | PP-A--E--                                       | PSPQ-PAHGQL--DT-MFPQPGLSLE-PE--ALPHS-----       | ----- |
| MmGdnf         | 112 | AA-A--L--                                       | PRRE-R-----                                     | ----- |
| DmDPP          | 271 | -----                                           | PKPG-LLTKSA--NTVRSRTHKDSKID-DR--FPHHH-----      | ----- |
| MmBmp2         | 96  | -----                                           | HRLE-RAASRA--NTVRSRHHEAVEELPE--MSGKT-----       | ----- |
| MmBmp4         | 102 | GT-G--L--                                       | EYPE-RPASRA--NTVRSRHHEEHLENIPG--TSESS-----      | ----- |

Fig. S8 Page 2

|                | begin | arm--β2----         | ----β3-----                | TGF-β---α3--                | TGF-β-β3-----     |
|----------------|-------|---------------------|----------------------------|-----------------------------|-------------------|
| MmBmp15        | 112   | VQTLDE-PLASNQVAYE   | IRATVYRQHLHL-VNYHL         | ---SCHVETWVPKCRTH           | ----              |
| MmGdf9         | 137   | MVDLLE-NLDRVTAMEH   | ILKSVLTYLTNNSASSSTV        | ---TCMCDLVV                 | ----              |
| MmNodal        | 73    | NWTFTE-DFSFLSQEED   | VWAEELRLQLPGMDIPT          | EGPLTIDIFHQAKGD             | -----             |
| MmGdf5         | 213   | KQRYVE-DISAL-EKDGL  | LCAEELRLRKPKPLDVAK         | PAVPSSGRVQKLKSSC            | -----             |
| MmGdf7         | 131   | QGSFLD-DVSSLSEADE   | VNAEELRLVLRSSPEPD          | ---RDSATLLPRLLSTC           | -----             |
| MmGdf6         | 148   | RQKYLE-DVSTLSDKEE   | VGAEELRLRQAPPTPW           | ---GLPARPLHLQ-LFPC          | -----             |
| DmActivin-beta | 659   | ILEFSAQNRRVPSQKLS   | RSQAQIHRIKDPHSLWIEKAKSL    | ---PE-----KHLL              | ---N              |
| CeTIG-3        | 36    | KDCFQHSINSINHE      | ---LSASLTH                 | -----DP                     | -----             |
| DmSCW          | 131   | -MHITENTNDVPVD      | -LSVQAMRLRYKQPSLVD         | -----                       | -----             |
| DmGBB          | 176   | -RRLWSDVSNVPND      | -NYVMAELRYQANEGKWL         | -----                       | -----             |
| MmBmp8a        | 123   | -KEFHEDLTQIPAG      | -EATTAEPRIYKEPSTHPL        | -----                       | -----             |
| MmBmp8b        | 123   | -KEFHEDLTQIPAG      | -EATTAEPRIYKEPSTHPL        | -----                       | -----             |
| MmBmp6         | 233   | -KEFKENLSQIPEG      | -EATTAEPRIYKDCVVGVSF       | -----                       | -----             |
| MmBmp7         | 153   | -REFREDLSKIPEG      | -EATTAEPRIYKDYIRERF        | -----                       | -----             |
| MmBmp5         | 178   | -KEFREDLTQIPHG      | -EATTAEPRIYKDKGNHRF        | -----                       | -----             |
| MmBmp3         | 109   | KGLHTE-NLTSLTKESEN  | LSATLYFVVGELVNI            | ---SLSCP-E--PQCSHHTQR       | ---               |
| MmGdf10        | 108   | KPVYFE-NLTSMDQSEM   | LTAAEFHSEPPRPW             | ---RAREVFCKPRAKNASCRLLTPG   | ---               |
| DmMyoglianin   | 348   | VDVFRS-QIDSSYSDL    | S---YATLHLYLRGWDWI         | ---SAHQPGLLIEIKKQP          | ---               |
| MmMstn         | 138   | CCFFKQ-SSKI         | -----QYNKVVAQLWI           | ---YLRPVKT                  | ---PTTVFVQILLR    |
| MmGdf11        | 159   | CCHFHQ-SPKV         | -----MFTKVLKAQLWV          | ---YLRPVPR                  | ---PATVYLQILLR    |
| MmTgfb1        | 126   | -----DISH           | ---SIY                     | ---MFFNTSDIREAVPEPPLLSRAELR | ---               |
| MmTgfb2        | 126   | GSLGSE-CSRQSQVLCGYL | DAIPPTTYRPFYRI             | ---VRFDVST                  | ---MEKNASNLVKAEFR |
| MmTgfb3        | 126   | -----               | ---GITSKV                  | ---FRFNVSS                  | ---VEKNGTNLFAEFR  |
| MmInha         | 113   | --TYVE-RPSQHIRSHQ   | ---MT                      | ---SAQLWF                   | ---HTG-LGRKS      |
| MmGdf15        | 113   | --QGL---PEAYRVHRALL | LLTP---TARFWD              | ---ITRPLKRALS               | ---LRGPAPALRLR    |
| MmGdf1         | 102   | --SRP---AQPARTSG    | -----LCPEWT                | ---VVFDSLNVEP               | ---TERPTRARLELR   |
| MmGDF3         | 94    | --LNT---QKPF-QDG    | -----SCLQKV                | ---LYFNLSAIKE               | ---KAKLTMAQLTLTD  |
| CeUNC-129      | 89    | QEVLVG-DVEGFDSHES   | MRRELHFLRRRDSFARRSRQIRAKSV | -----                       | -----             |
| CeDAF-7        | 119   | -----SDILCATL       | THSIEIP                    | ---A---KDSG                 | -----             |
| DmMaverick     | 379   | -----NFHDKHDEANVR   | MLLYSSSLATNFRRGPGSRKN      | ---KISQISGNDN               | ---               |
| MmInhba        | 133   | RKTLHEISKEGSDLSV    | VERAEVWLKVP                | ---KAN---R---T---R          | -----             |
| MmInhbb        | 160   | RVRLYEFVSNEGNQNL    | FVCAEWLKLKLL               | ---PYVLEKG                  | ---S---R          |
| MmInhbc        | 112   | QTRLESHFSGRMASGME   | VRQTRFMFVQFP               | ---HNATQT                   | -----             |
| MmInhbe        | 107   | RSMLTQLSPLWSHH      | ---LYHAR                   | ---LWLHVP                   | ---PSFPGT         |
| CeDBL-1        | 109   | -YNL--SLAARNAHNEE   | TKATLKLRLRRN               | ---NKARRS                   | -----             |
| MmGdf2         | 129   | KHILIS--NISIPRHEQ   | TRAEELRLVW                 | ---S---CQNDVD               | -----             |
| MmBmp10        | 125   | KYPLIE--NVSIPHHEE   | VMAELRLHT                  | ---L---VQRDRM               | -----             |
| CeTIG-2        | 100   | ADRIVSHMAQEVSHRL    | DDGSYSIRFAK                | ---E---HVPKEGQSIV           | ---R              |
| DmDawdle       | 347   | -----               | ---MSTAVWLEK               | ---N---KQNRDTASVN           | ---S              |
| MmLefty1       | 96    | THLLVGEQRLPPNSEI    | VCAVRLRQ                   | ---E---FVPRTA               | ---LRR            |
| MmLefty2       | 96    | THLLVGEQRLPPNSEI    | VCAVRLRQ                   | ---E---FVPRTA               | ---LRR            |
| MmAmh          | 284   | ADPFLE-TLTRLVR      | -ALRGPLTQASN               | -T---QLALDPGALAS            | -F-----PQ         |
| MmGdnf         |       |                     |                            |                             |                   |
| DmDPP          | 302   | RFRLEH-DVKSIPADEK   | KAAEELQTR                  | -D---ALSQQVVASRS            | -S-----AN         |
| MmBmp2         | 128   | ARRFFE-NLSSVPSDEF   | TSAEELRIR                  | -E---QIQEALGNSSF            | -Q-----HR         |
| MmBmp4         | 138   | AFRFLD-NLSSIPENEV   | SSAEELRLR                  | -E---QVDQGPDWEQG            | -F-----HR         |
|                |       | Activin+BMP-α3      | --β4----                   |                             |                   |
| MmBmp15        | 162   | -----               | ---LPS                     | -----SKSGSSKP               | ---               |
| MmGdf9         | 181   | -----               | ---KEA                     | -----MSSGRAPP               | ---               |
| MmNodal        | 122   | -----               | ---                        | ---PERDPADCLE               | ---               |
| MmGdf5         | 263   | -----               | ---                        | ---PSGRQPAALLD              | ---               |
| MmGdf7         | 179   | -----               | ---                        | ---PDEAGTAHLH               | ---               |
| MmGdf6         | 195   | -----               | ---                        | ---LS                       | ---PLLLD          |
| DmActivin-beta | 707   | --TK-----RKWGA      | NKPHHRIKMTFQLSTSIN         | ---I---T---EKGIDKAI         | ---               |
| CeTIG-3        | 60    | -----               | ---KDTNISVVEVDE            | ---L---FG                   | ---ELQ            |
| DmSCW          | 162   | -----               | ---RRANFTVSRKLD            | ---N---RQ                   | ---DFSYR          |
| DmGBB          | 210   | -----               | ---ANREFTITVAIGT           | ---G---TLGQH-TME            | ---               |
| MmBmp8a        | 155   | -----               | ---NTTLHHSMEVVQ            | ---E---HSNRESDLF            | ---               |
| MmBmp8b        | 155   | -----               | ---NTTLHHSMEVVQ            | ---E---HSNRESDLF            | ---               |
| MmBmp6         | 265   | -----               | ---KNQTFLESYQVLQ           | ---E---HQHRDSDLF            | ---               |
| MmBmp7         | 185   | -----               | ---DNETFQITVQVLQ           | ---E---HSGRESDLF            | ---               |
| MmBmp5         | 210   | -----               | ---ENETIKSSEIPIK           | ---E---YTNRDADLF            | ---               |
| MmBmp3         | 157   | -----               | ---QHIQIDSAAILKS           | ---                         | ---NQSQLLG        |
| MmGdf10        | 162   | -----               | ---LPARLHIFRSLS            | ---                         | ---QNTATQG        |
| DmMyoglianin   | 393   | --RK-----DIVVTI     | HRAIRANNT                  | ---                         | ---SFNPKVKMF      |
| MmMstn         | 177   | LIKPMKD             | -----                      | ---                         | ---GTRYT          |
| MmGdf11        | 198   | LKPLTGEGTAGGG       | -----                      | ---                         | ---GGGRRHI        |
| MmTgfb1        | 157   | LQRL-----KS         | ---SVEQHMEVYQYS            | -----                       | ---NNSWRYL        |
| MmTgfb2        | 179   | VFRL-----QNP        | K---ARVAEQRELYQILKSK       | -----D                      | ---LTSPTQRYI      |
| MmTgfb3        | 153   | VLRV-----PNPS       | ---SKRTEQRDELQILRPD        | -----E                      | ---H-IAKQRYI      |
| MmInha         | 149   | SAPLLDLLVLSGG       | PMAVPVS LGQGPRAVLH         | ---                         | ---LAASAFP        |
| MmGdf15        | 159   | LTPPPDLAMLPSGGT     | QLELRLRVAAGRGR             | ---                         | ---               |
| MmGdf1         | 141   | LEAESE---DTGGWEL    | ---SVALWADAE               | ---                         | ---HPGPELL        |
| MmGDF3         | 132   | LGPRSY---YNLRPELV   | VALSVQDRGVGRSH             | ---                         | ---PKVGRLL        |
| CeUNC-129      | 134   | -----               | ---CNEYCR                  | -----                       | ---               |
| CeDAF-7        | 139   | -----               | ---MLQDVQVQTEKNEDG         | ---SMGEMVTSG                | ---IFATKGSER      |
| DmMaverick     | 424   | IERHCNFGDVNLN       | ---QSNKNSSQLTETKQQLLSAN    | ---                         | ---RRR            |
| MmInhba        | 169   | -----               | ---TKVTIRLHQQKHFPQGLD      | TGDEAEEMGLKGRSEL            | ---               |
| MmInhbb        | 199   | -----               | ---RKVRVQVQFE              | ---                         | ---QGHGDRW        |
| MmInhbc        | 148   | -----               | ---MNRRLVLRP               | ---                         | ---YDTNLT         |
| MmInhbe        | 139   | -----               | ---LYRDERCGT               | ---                         | ---TRCRGF         |
| CeDBL-1        | 142   | -----               | ---GNISSEYFF               | ---                         | ---EDDINNDRF      |
| MmGdf2         | 161   | -----               | ---STHGLEGSVVVDVLEDS       | ---ET                       | ---WDQATGTKT      |
| MmBmp10        | 157   | -----               | ---MYDGVDRKTHSEVLESA       | ---DG                       | ---SEERSM-L       |
| CeTIG-2        | 140   | -----               | ---AQLRHQHGIVSPV           | ---FF                       | ---Y---IEDTNL     |
| DmDawdle       | 371   | -----               | ---SAQQTIVSEV              | ---E                        | ---VDQQKDSKY      |
| MmLefty1       | 136   | L-----              | ---SPHSARARVTH             | ---EWL                      | ---RF---RDDGSNRTA |
| MmLefty2       | 136   | L-----              | ---SPHSARARVTH             | ---EWL                      | ---RV---REDGSNRTA |
| MmAmh          | 323   | -----               | ---GLNLSDPALG              | ---RL                       | ---LDWEEPILL      |
| MmGdnf         |       |                     |                            |                             |                   |
| DmDPP          | 343   | -----               | ---RTRYQNLWDITRVG          | ---VR                       | ---GQREPSYL       |
| MmBmp2         | 169   | -----               | ---DNDEIIPKA               | ---AA                       | ---NL-KFPVTR      |
| MmBmp4         | 179   | -----               | ---DNDEIIPKA               | ---AE                       | ---MVPGHLLTR      |

Fig. S8 Page 3

|                                                          |     | -----β5-----                             | -----β6-----                                | -----α4-----       | -----β7----- | TGFβ-β8       |
|----------------------------------------------------------|-----|------------------------------------------|---------------------------------------------|--------------------|--------------|---------------|
| MmBmp15                                                  | 173 | -----SPMSKAMT-EIDTTHCI                   | -----CQKLWNRKGRSVPRFRM                      | -----CQK           |              |               |
| MmGdf9                                                   | 192 | -----RAP-----YSFTLKKHRAI-EIDTSL          | -----QPLVTSSERSIHSNFT                       | -----CTK           |              |               |
| MmNodal                                                  | 132 | RIMETFTVI-----PSQVTFASGST-VLNAIK         | -----PLSKWLKDPAEKEQVSSRAEK                  | -----NH            |              |               |
| MmGdf5                                                   | 274 | V-----RSV-----PGL-----DGSQME-VSDWKLF-RM  | -----KNSAC                                  | -----EAW           |              |               |
| MmGdf7                                                   | 190 | S-----RAA-----EPLG-----GARME-ADVTDAI     | -----QSHRRWPASRKFV                          | -----RAVT          |              |               |
| MmGdf6                                                   | 202 | A-----RTL-----DPGPTQAGME-VSDWQGG-RP      | -----QPKQ                                   | -----RAAMG         |              |               |
| DmActivin-beta                                           | 744 | -----FRASF-----QVDPKNLGMQ-KSDTDTI        | -----RENYGH-TSHEKRL                         | -----IDCTGCCG      |              |               |
| CeTIG-3                                                  | 80  | -----YDRF-----EI-RETLDKY-HSDSHLF         | -----HKMKQ-KSSDKMKI                         | -----EITNS         |              |               |
| DmSCW                                                    | 184 | -----IGSV-----NTSSQRGM-EIDTDTI           | -----RYALHN-KGLQRNEL                        | -----RIS           |              |               |
| DmGBB                                                    | 233 | -----PSSV-----NTGDYVGM-ELNTEG            | -----HEALVK-SKDNHG                          | -----GAHAV         |              |               |
| MmBmp8a                                                  | 178 | -----FDLQ-----TLRSQDEGM-VLDTAAS          | -----DRLLN-HHKD                             | -----YVET          |              |               |
| MmBmp8b                                                  | 178 | -----FDLQ-----TLRSQDEGM-VLDTAAS          | -----DRLLN-HHKD                             | -----YVET          |              |               |
| MmBmp6                                                   | 289 | -----LSDR-----VWASEEGM-EEDTATS           | -----NLAVVT-PQHN                            | -----SVET          |              |               |
| MmBmp7                                                   | 209 | -----LSDR-----TIWASEEGM-VSDTATS          | -----NRAVNV-PRNN                            | -----SVET          |              |               |
| MmBmp5                                                   | 234 | -----LSDR-----KTQALDVM-VSDTATS           | -----NRAVIN-PQNN                            | -----CAET          |              |               |
| MmBmp3                                                   | 178 | -----HSDVD-----VRPYRDSVM-SKDTQL          | -----RKAKQN-EFLGNIT                         | -----SRAHE         |              |               |
| MmGdf10                                                  | 182 | -----LARGAM-----ALTPPPRLGM-ANDSII        | -----KAARRD-GELL                            | -----TGKED         |              |               |
| DmMyoglianin                                             | 420 | -----EFR-----HSIPSGLGQV-AVDKSL           | -----GNLGSN-----TCEIL                       | -----TKGE          |              |               |
| MmMstn                                                   | 189 | -----GIRSLK-----LDMSPGTGMQ-SIDKTV        | -----QNALKQ-PESN                            | -----ALDEN         |              |               |
| MmGdf11                                                  | 218 | -----RIRSLK-----IELHSRSGHM-SIDKQV        | -----HSMFRQ-PQSNW                           | -----AFDPS         |              |               |
| MmTgfb1                                                  | 183 | -----G-----NR-----LLTPTDTPM-SDDTVGV      | -----RQNLQ-GDGIQGFRESAHCDSK                 |                    |              |               |
| MmTgfb2                                                  | 214 | -----D-----SK-----VVKTRAEGEM-SDDTDV      | -----QRLHH-KDRNGFKISLHCPCTF                 |                    |              |               |
| MmTgfb3                                                  | 187 | -----G-----GK-----NLPTRGTAEM-SDDTDV      | -----RQALLR-RESN                            | -----IHCPCTF       |              |               |
| MmInha                                                   | 189 | -----L-----L-----                        |                                             |                    |              |               |
| MmGdf15                                                  |     | -----                                    |                                             |                    |              |               |
| MmGdf1                                                   | 170 | -----RVPPPGVLL-RAL                       | -----LGTA-VAANAS--VPCT                      | -----RAL           |              |               |
| MmGDF3                                                   | 169 | -----F-----LR-----SVPGPQQL               | -----CQNLQGA-KDSSN                          | -----RLKND         | -----HLE     | -----ILVKE    |
| CeUNC-129                                                | 141 | -----QOTLKIRVG-----GDNLEEKVIA            | -----PDKSFDSDHDA-KQAVFR                     | -----R             |              |               |
| CeDAF-7                                                  | 173 | -----ISILPI-----                         | -----DTVKSMTISPIOGIFVKAMLDG                 | -----RN            | -----TAH     | -----PQQT     |
| DmMaverick                                               | 461 | -----KITSRKIEFGNVGFQETRTQMI              | -----EEDTKAM-RSLN                           | -----SHEN          | -----GIE     | -----IQCDKCKS |
| MmInhba                                                  | 205 | -----LSEKVVVD-----A-----RKSTM            | -----IPSSSS-QRLLDQ-GKSSD                    | -----DAR           | -----IACQCOE |               |
| MmInhbb                                                  | 217 | -----NVEKKVD-----L-----KRSQAH            | -----TTPTEAL-QALFER-GERRND                  | -----VCCSCCOE      |              |               |
| MmInhbc                                                  | 164 | -----LTSQVVVQ-----V-----NASQNY           | -----QLLQPEA-QAACSQ-GHLT                    | -----E             |              | -----VPES     |
| MmInhbe                                                  | 155 | -----RTFLAEHQ-----T-----TSSGM            | -----ALTPSSG-LRSEDS-GVVKQ                   | -----E             |              | -----FRPLD    |
| CeDBL-1                                                  | 159 | -----CESRSV-----DNLTETI                  | -----DQTAAF-LRRTNR-ISFF                     | -----D             | -----PED     | -----VEIEE    |
| MmGdf2                                                   | 190 | -----F-----VS-----QDI-----RDEGM          | -----TLVSSAN-KRAVRA-DSTTNK                  | -----N             | -----K       | -----LEVIV    |
| MmBmp10                                                  | 185 | -----V-----VS-----TEIYGTNSEM             | -----TDDTAT-RRQKS-GPSTHO                    | -----E             | -----I       | -----HIES     |
| CeTIG-2                                                  | 163 | -----PGDVTLV-----SDPTVVTD                | -----TMM-DRASHL-QLST                        | -----P             | -----V       | -----TAR-A    |
| DmDawdle                                                 | 392 | -----LSAAKTIA-----IQSVNVQDEM             | -----KIDHEWFI-KHISG-HELSHL                  | -----Q             | -----I       | -----ITCGGCOV |
| MmLefty1                                                 | 162 | -----LSDRLVS-----I-----H-ESGAK           | -----ADTTEAL-NPQOL-SRPROP                   | -----L             | -----L       | -----QVSV     |
| MmLefty2                                                 | 162 | -----LSDRLVS-----I-----H-ESGAK           | -----ADTTEAL-NPQOL-SRPROP                   | -----L             | -----L       | -----QVSV     |
| MmAmh                                                    | 346 | -----LSPAA-----                          | -----ATEREPMLHGPA-AFAAG-LQRR                | -----A             | -----E       | -----LQAAA    |
| MmGdnf                                                   |     | -----                                    |                                             |                    |              |               |
| DmDPP                                                    | 368 | -----LSDTKTVR-----L-----N-STDIV          | -----SLOTPAN-DRMLAS-PQNYG                   | -----L             | -----E       | -----VEV      |
| MmBmp2                                                   | 189 | -----LSDTRLVN-----Q-----N-TSCME          | -----SDDTPAN-MRATTQ-GHTNHGF                 | -----V             | -----E       | -----VEV      |
| MmBmp4                                                   | 200 | -----LSDTRLVH-----H-----N-VTRME          | -----TQVSPAN-LRRTRE-KQPNYG                  | -----A             | -----E       | -----LEV      |
| only TGFβ-β8---bowtie---only TGFβ-β9----- BMP only -β9'- |     |                                          |                                             |                    |              |               |
| MmBmp15                                                  | 210 | QKG-----                                 | -----NET-----REFRWH                         | -----G             |              |               |
| MmGdf9                                                   | 235 | DQV-----                                 | -----PED-----GVFSMP                         |                    |              |               |
| MmNodal                                                  | 184 | Q-----                                   | -----PYTPPVV                                |                    |              |               |
| MmGdf5                                                   | 312 | -----                                    | -----RGRAVDLRGLGFERT                        | -----A             |              |               |
| MmGdf7                                                   | 232 | -----                                    | -----ASESSPLALRRLGFGWP                      | -----GGG           |              |               |
| MmGdf6                                                   | 242 | ELDAGD---TGAR-----                       | -----ARGPQQPPPLDLRSLGFGRR                   | -----V             |              |               |
| DmActivin-beta                                           | 787 | -----                                    | -----RYSL-----HLFQTS-KLRGN                  | -----SSDY          |              |               |
| CeTIG-3                                                  | 122 | -----N-----                              | -----TONV-----IN-ALS-VL-R                   |                    |              |               |
| DmSCW                                                    | 225 | -----IG-----                             | -----DSQL-----STFAAG-LVTP                   | -----Q             |              |               |
| DmGBB                                                    | 276 | -----NRP-----                            | -----DREV-----KLDDIG-LIHR                   | -----Q             |              |               |
| MmBmp8a                                                  | 220 | -----AD-----                             | -----GHSN-----DPGLAG-LLGR                   | -----Q             |              |               |
| MmBmp8b                                                  | 220 | -----ED-----                             | -----GHSI-----DPGLAG-LLGR                   | -----Q             |              |               |
| MmBmp6                                                   | 331 | -----RD-----                             | -----GLHV-----NPRAAG-LVGR                   | -----D             |              |               |
| MmBmp7                                                   | 251 | -----LD-----                             | -----GQSI-----NPKLAG-LIGR                   | -----H             |              |               |
| MmBmp5                                                   | 276 | -----GD-----                             | -----GRSI-----NVKSAG-LVGR                   | -----H             |              |               |
| MmBmp3                                                   | 224 | -----LPKRMFLFFPEPYILVYANDAAISEPESVVS     | -----LQRH-RDFTAG-TG                         | -----PR            |              |               |
| MmGdf10                                                  | 228 | -----PGVPRPSSHMPYILVYANDLAISEPNSVAVSLQRY | -----DPFPAG-DFEPGA                          | -----APN           |              |               |
| DmMyoglianin                                             | 459 | -----TW-----                             | -----MKSLVTTDNT                             |                    |              |               |
| MmMstn                                                   | 235 | -----GHD-----                            | -----LAVTFPGP                               |                    |              |               |
| MmGdf11                                                  | 264 | -----GTD-----                            | -----LAVTSLGP                               |                    |              |               |
| MmTgfb1                                                  | 226 | -----DNK-----                            | -----LHVEING---I-SPKRRG-DLGTI               | -----H             |              |               |
| MmTgfb2                                                  | 257 | -----VPSNNYIIPNKS-----EELERFAGIDGT       | -----STYASG-DQKTIK                          | -----STR           |              |               |
| MmTgfb3                                                  | 230 | -----QPNGD-IENVH-----                    | -----EVMEIKFKGVND-DHGRG-DLGRK               |                    |              |               |
| MmInha                                                   | 191 | -----                                    |                                             |                    |              |               |
| MmGdf15                                                  |     | -----                                    |                                             |                    |              |               |
| MmGdf1                                                   | 203 | -----                                    | -----SLHPG-ATAACG                           | -----R             |              |               |
| MmGDF3                                                   | 210 | -----DRY-----                            | -----SRVTQ-PENPCD                           | -----R             |              |               |
| CeUNC-129                                                | 186 | -----EH-----                             | -----SKMRPY-----                            | -----A             |              |               |
| CeDAF-7                                                  | 214 | -----ADV-----                            | -----DNMLQ                                  |                    |              |               |
| DmMaverick                                               | 510 | -----                                    | -----IGARIL-----SDFSPT-P-FRST               | -----ASS           |              |               |
| MmInhba                                                  | 247 | -----                                    | -----SGASLV-----LLGKK-K-KKEVDG-DGKKKDGSDGGL | -----EE            |              |               |
| MmInhbb                                                  | 259 | -----                                    | -----LAVVPV-----FVD                         |                    |              |               |
| MmInhbc                                                  | 204 | -----QVA-----                            | -----                                       | -----HSSL-I        |              |               |
| MmInhbe                                                  | 197 | -----LNS-----                            | -----TAAG-----                              | -----LPRL          | -----L       |               |
| CeDBL-1                                                  | 202 | -----TQSSSL-----                         | -----SSLPYA-----                            |                    |              |               |
| MmGdf2                                                   | 230 | -----Q-----                              | -----SHRES-----CDT                          | -----L             | -----DISV    |               |
| MmBmp10                                                  | 227 | -----RQN-----                            | -----QAEDTG-----RGQ                         | -----LEIDM         |              |               |
| CeTIG-2                                                  | 203 | -----S-----                              | -----                                       | -----T             |              |               |
| DmDawdle                                                 | 438 | -----                                    | -----SDMEEI-----                            | -----I             |              |               |
| MmLefty1                                                 | 204 | -----QRE-----                            | -----HLGPGT-----WSS                         | -----HK            | -----LVR     |               |
| MmLefty2                                                 | 204 | -----QRE-----                            | -----HLGPGT-----WSA                         | -----HK            | -----LVR     |               |
| MmAmh                                                    | 385 | -----SEL-----                            | -----RDLPLG-----PPTA-P-PL                   | -----LARLLALCPNDSR |              |               |
| MmGdnf                                                   |     | -----                                    |                                             |                    |              |               |
| DmDPP                                                    | 408 | -----RTV-----                            | -----RSLKPA-----PHH                         | -----HVRLRRSADAE   | -----H       |               |
| MmBmp2                                                   | 229 | -----AHL-----                            | -----EENPGV-----SKR                         | -----HVRISRSLHQD   | -----E       |               |
| MmBmp4                                                   | 240 | -----THL-----                            | -----HQTRTH-----CQ                          | -----HVRISRSLPQ    | -----S       |               |

Fig. S8 Page 4

|                |     | --β10--   | ---α5-TGFβ only |                                      |                           |              |
|----------------|-----|-----------|-----------------|--------------------------------------|---------------------------|--------------|
| MmBmp15        | 223 | -MTSLDVAF | LYFNDTDDR       | -----QCK-L-----                      |                           |              |
| MmGdf9         | 247 | ---LSVFE  | SLIYLNDS        | TQA-----YHS-W-----QS-L-----Q-S       |                           |              |
| MmNodal        | 193 | ---ASTNV  | MLMYSNR         | PQEQR-----QL-----GGAT-LLWE-A-----E-S |                           |              |
| MmGdf5         | 328 | --RQVHEKA | LVFGR           | TKKRD-----LFFNEI                     | ARSQD-DKT                 | V--Y-----E-Y |
| MmGdf7         | 254 | GGTAAEER  | ALV             | ISSRTQKE-----SLFREI                  | SAARAL-RAA                | -----        |
| MmGdf6         | 273 | --RPPQER  | ALV             | VFTRSQRKN-----LFTEM                  | EEQLGSA-EAAG-A            | -----E-G     |
| DmActivin-beta | 809 | LSTNPNR   | ELV             | VHTES-----SRTR                       | VR-----                   |              |
| CeTIG-3        |     |           |                 |                                      |                           |              |
| DmSCW          | 242 | ASRTSLE   | EFV             | GYFNGPELLV-----KIQKLR                | FKR-----                  |              |
| DmGBB          | 294 | V-DDEF    | CFE             | VGFFRGPELIK-----ATAHSS               | HRSKR-----                |              |
| MmBmp8a        | 237 | A-PRSR    | CFE             | VWTFFRASQSPV-----RAPR-----           |                           |              |
| MmBmp8b        | 237 | A-PRSR    | CFE             | VWTFFRANQSPV-----RAPRTA              | -----                     |              |
| MmBmp6         | 348 | G-PYDK    | QCFE            | VAFFKVSEVHV-----RTTR-----            |                           |              |
| MmBmp7         | 268 | G-PQNK    | QCFE            | VAFFKATEVHL-----RSIR-----            |                           |              |
| MmBmp5         | 293 | G-PQSK    | QCFE            | VAFFKASEVLL-----RSVR-----            |                           |              |
| MmBmp3         | 269 | L--DSHV   | R-----          | E-----ALSVER                         | KKR-----                  |              |
| MmGdf10        | 278 | SSADPR    | VR-----         | R-----AAQVSK                         | PLQDNELPGLDE-RPAPALHAQNFH |              |
| DmMyoglianin   | 472 | ---SKNEL  | TWH             | IEIG-----SQKKHR                      | KKR-----                  |              |
| MmMstn         | 246 | -GEDGL    | NFE             | LEKVTD-----TPKRSR                    | -----                     |              |
| MmGdf11        | 275 | -GAEGL    | HFE             | LEVRLE-----NTKRSR                    | -----                     |              |
| MmTgfb1        | 252 | --DMNR    | FE              | LMATPLERAQ-----HLHSSR                | RR-----                   |              |
| MmTgfb2        | 300 | KKTSGK    | TFE             | LMMLPSYRLE-----SQSSSR                | KKR-----                  |              |
| MmTgfb3        | 269 | KQKDH     | NFE             | LMMPHRLD-----SPFGSQ                  | RKR-----                  |              |
| MmInha         | 191 | ---THE    | LV              | VLLRCLCS-----CSG                     | PETTP-----                |              |
| MmGdf15        |     |           |                 |                                      |                           |              |
| MmGdf1         | 215 | L---AEAS  | HL              | LVTLDPRLCP-----LPRLRR                | HRTE-----                 |              |
| MmGDF3         | 226 | LLRSL     | HASL            | LVVTLNPKHCH-----PSS                  | KKR-----                  |              |
| CeUNC-129      | 195 | EMIRK     | STF             | FLVYSKVNHTLDTVSVMKQTEQTKRK           | RDLGNE-ELREYYNYSIPLDND    |              |
| CeDAF-7        | 223 | -----LSTR | -----           | -----PKGSRKR                         | -----                     |              |
| DmMaverick     | 534 | DEHLN     | LMF             | VNIIGHGT-----LNSQH                   | -----GDA-D---IH--QIMLTNNR |              |
| MmInhba        | 282 | EKEQSH    | RFE             | LMQARQS-----EDHPHR                   | RR-----                   |              |
| MmInhbb        | 271 | PGEESH    | RFE             | VVQARLG-----DSRHR                    | IR-----                   |              |
| MmInhbc        | 212 | LGWF      | SHR             | FEVAAQVRVE-----GKHR                  | VR-----                   |              |
| MmInhbe        | 210 | DTAGQ     | RFE             | LEKIRAN-----EPGAGR                   | RR-----                   |              |
| CeDBL-1        | 214 | --RAQS    | AFL             | LVFSDLSE-----PSSVRR                  | KK-----                   |              |
| MmGdf2         | 244 | PPGSK     | NIF             | FFVVFSSNDR-----SNGTKET               | LELKE---MI-GHEQETMLVKTA   |              |
| MmBmp10        | 244 | SAQNKH    | FE              | LVFSSDDQ-----SNDK-EQ                 | EEELNE---LI-THEQDLDLSDA   |              |
| CeTIG-2        | 205 | NDELK     | IEA             | PLVALKDE-----DAGPPK                  | KSRRSAS-TTPI-SAPPMRQKVKRS |              |
| DmDawdle       | 448 | SVDKDY    | RFE             | LVDMQNR-----RR-----                  |                           |              |
| MmLefty1       |     |           |                 |                                      |                           |              |
| MmLefty2       |     |           |                 |                                      |                           |              |
| MmAmh          | 414 | SSGDPL    | RAL             | LVKALQG-----LRAEWH                   | -----GRE-G---R-----       |              |
| MmGdnf         |     |           |                 |                                      |                           |              |
| DmDPP          | 432 | ERWQH     | KCFE            | LVFTYTDG-----RHKARS                  | IVDSGGE-G---G-----        |              |
| MmBmp2         | 253 | HSWSQ     | IRF             | LVTFGHDG-----KGHP                    | LHKR                      |              |
| MmBmp4         | 264 | GDWAQ     | LFE             | LVTFGHDG-----RGHT                    | LTR                       |              |

**Fig. S8. Expanded All family members prodomain alignment indicating structural conservation.**

Sequences from Fig. 10 including underlining from Figs. 2, 4, 6, 8 and 10 are presented as in Fig. S4. Note that on the top half of Fig. S8 Page 1 there is an exception to the presentation of accurate numbering (shown by a double backslash). We removed a completely nonconserved stretch of 25 residues from Activin for efficiency of presentation. This allowed the unexpectedly conserved cysteines in the Association-region of ten proteins to be displayed near the structural features of the straightjacket. In the Association region unexpected cysteines conservation is underlined in red with known cysteines in TGF-β1-3 underlined in black. Accurate numbering for Activin resumes with the next alignment set below. All other numbering is accurate throughout. Also note that in the top half of Fig. S8 Page 4, the dimerization region β8 displays unexpectedly conserved cysteines in eight proteins underlined in red. Known β8 region cysteines in TGF-β1-3 are underlined in black. The features of TGF-β1 not conserved are α3, β5, β9 and α5. Features of BMP9 that are not conserved are β5 and β9’.
